## **Dynamic changes in oligomeric complexes of UPR sensors induced by misfolded proteins in the ER**

Arunkumar Sundaram<sup>1</sup>, Suhila Appathurai and Malaiyalam Mariappan<sup>1\*</sup>

Department of Cell Biology  
Nanobiology Institute  
Yale School of Medicine  
Yale West Campus  
West Haven, CT 06516, USA

\* Correspondence: [malaiyalam.mariappan@yale.edu](mailto:malaiyalam.mariappan@yale.edu)

## 1 **Abstract**

2

3 The endoplasmic reticulum (ER) localized unfolded protein response (UPR) sensors, IRE1 $\alpha$ ,  
4 PERK, and ATF6 $\alpha$ , are activated upon accumulation of misfolded proteins caused by ER  
5 stress. It is debated whether these UPR sensors are activated either by the release of their  
6 negative regulator BiP chaperone or directly binding to misfolded proteins during ER stress.  
7 Here we simultaneously examined oligomerization and activation of all three endogenous  
8 UPR sensors. We found that UPR sensors existed as preformed oligomers even in unstressed  
9 cells, which shifted to large oligomers for PERK and small oligomers for ATF6 $\alpha$ , but little  
10 changed for IRE1 $\alpha$  upon ER stress. Neither depletion nor overexpression of BiP had  
11 significant effects on oligomeric complexes of UPR sensors both in unstressed and stressed  
12 cells. Thus, our results find less evidence for the BiP-mediated activation of UPR sensors in  
13 mammalian cells and support that misfolded proteins bind and activate the preformed  
14 oligomers of UPR sensors.

15

16

## 17 **Introduction**

18

19 The endoplasmic reticulum is the major organelle for the synthesis of secretory and  
20 membrane proteins. These proteins enter the ER through the Sec61 translocon channel and  
21 mature with the help of cascade of chaperones, folding enzymes and post-translocation  
22 modifications (Rapoport, 2007; van Anken 2005). The proteins that fail to achieve their  
23 native state are recognized and eliminated by the ER associated degradation (ERAD)  
24 pathways (Brodsky, 2012; Christianson and Ye, 2012 ). Thus, only folded proteins are  
25 packaged into vesicles for their transport to the Golgi apparatus. However, environmental  
26 stress, nutrient protein overload, or expression of mutant proteins overwhelms ERAD  
27 machinery, thus leading to accumulation of misfolded proteins in the ER. The excess of  
28 misfolded proteins activates the conserved unfolded protein response (UPR) pathway, which  
29 transmits the information of the folding status of the ER to the cytosol and nucleus (Walter  
30 and Ron, 2011). This leads to activation of transcriptional and translational programs to  
31 increase the ER protein folding capacity by upregulating chaperones folding enzymes, and  
32 ERAD machinery (Lee et al., 2003; Shoulders et al., 2013). In case of failure to attenuate the  
33 UPR due to prolonged stress, the cells commit suicide by initiating apoptotic pathways. The  
34 dysfunction or overactive UPR signaling has been implicated in numerous human diseases

35 including type 2 diabetes, neurodegenerative diseases, and cancer (Han et al., 2009; Hetz,  
36 2012; Wang and Kaufman, 2016).

37

38 In metazoans, three UPR sensors, IRE1 $\alpha$ , PERK and ATF6 $\alpha$  are known to detect the  
39 accumulation of misfolded proteins in the lumen and transmit the signal to the cytosol  
40 (Walter and Ron, 2011). IRE1 $\alpha$  is a transmembrane kinase/endonuclease (RNase) that, upon  
41 ER stress, initiates the unconventional splicing of XBP1 mRNA (Cox et al., 1993; Mori et al.,  
42 1993; Yoshida et al., 2001; Calton et al., 2002). The spliced XBP1 mRNA encodes an active  
43 transcription factor that upregulates genes such as chaperones and ER degradation machinery  
44 to improve the ER protein folding capacity (Lee et al., 2003; Shoulders et al., 2013). In  
45 addition, IRE1 $\alpha$  can also reduce protein synthesis load at the ER through promiscuously ER-  
46 localized mRNAs encoding membrane and secretory proteins, a process known as IRE1 $\alpha$ -  
47 dependent mRNA decay (RIDD) (Hollien and Weissman, 2006; Hollien et al., 2009). PERK  
48 is a transmembrane kinase, and its luminal domain shares a limited homology (~12%) to the  
49 luminal domain of IRE1 $\alpha$  (Zhou et al., 2006). Upon ER stress, PERK phosphorylates  
50 eukaryotic translation initiation factor to shut down the overall protein synthesis, thus  
51 counteracting protein overload at the ER (Harding et al., 1999; Sood et al., 2000). However,  
52 some mRNAs that have small open reading frames in their 5' untranslated regions are  
53 translated by phosphorylated eIF2 $\alpha$ , thereby production of transcription factors such as ATF4  
54 (Ameri and Harris, 2008). ATF6 $\alpha$  is an ER-localized transmembrane transcription factor  
55 (Haze et al., 1999). During ER stress conditions, ATF6 $\alpha$  transported to the Golgi apparatus,  
56 where its cytoplasmic domain is released from membrane domain by S1P and S2P-mediated  
57 proteolysis (Ye et al., 2000; Nakanaka et al. 2007; Shindler and Schekman, 2009). The  
58 cleaved ATF6 $\alpha$  moves to the nucleus and drives transcription of genes encoding chaperones  
59 and ERAD machinery for restoring ER homeostasis (Lee et al., 2003; Shoulders et al., 2013).

60

61 While there is tremendous progress has been made in understanding the biology of  
62 UPR effectors, the mechanism of UPR sensors activation remains incompletely understood.  
63 There are two major models have been actively debated for the activation of UPR sensors  
64 (Walter and Ron 2011; Snapp, 2012). The first model is similar to other stress sensing  
65 pathways such as the heat shock response that is strongly regulated by the binding and  
66 availability of a chaperone (Arsene et al., 2000; Anckar et al., 2011). Accordingly, BiP binds  
67 with monomers of IRE1 $\alpha$  and PERK, thus preventing oligomerization and activation in  
68 unstressed cells. During ER stress, BiP is sequestered by misfolded proteins, thus allowing

69 IRE1 $\alpha$  and PERK to freely diffuse, oligomerize and become activated. This model is  
70 supported by the evidence that IRE1 $\alpha$  and PERK associate with BiP in unstressed cells and  
71 that the association is disrupted in the presence of ER stress (Bertolotti et al., 2000; Okamura  
72 et al., 2000; Oikawa et al., 2009; Carrara et al., 2015). The activation of ATF6 $\alpha$  appears to be  
73 slightly different from other two sensors since it seems to form oligomers under unstressed  
74 conditions but associated with BiP (Nadanaka et al. 2007; Gallagher et al., 2016; Shen et al.,  
75 2002). Upon ER stress, ATF6 $\alpha$  moves from the ER to the Golgi, which appears to correlate  
76 with the release of BiP from ATF6 $\alpha$  (Shen et al., 2002).

77

78 In the second model, unfolded proteins may directly bind to the luminal sensor  
79 domains of UPR sensors with concomitant release of BiP from the luminal domains. This  
80 binding may drive oligomerization change and activation of UPR sensors (Walter and Ron,  
81 2011). The first evidence supporting this model came from crystal structures of yeast Ire1p  
82 luminal domain, which resembles the peptide-binding groove of MHC-I (Credle et al., 2005).  
83 Based on this, the Peter Walter group proposed the peptide-binding hypothesis. This idea is  
84 corroborated by the detection of interaction between misfolded proteins and Ire1p (Kimata et  
85 al., 2007; Gardener et al., 2011). However, there are studies challenge the peptide-binding  
86 model. First, the human IRE1 $\alpha$  luminal domain structure exhibits a narrow peptide-binding  
87 groove of MHC-1, which may not accommodate misfolded proteins, although a recent study  
88 suggests a mutation in the groove of MHC-1 seems to interfere with the detection of  
89 misfolded proteins in the ER lumen (Kono et al., 2017). Unlike yeast Ire1p, human IRE1 $\alpha$   
90 does not seem to interact with misfolded proteins (Oikawa et al., 2012). Second, the fact that  
91 monomeric form of IRE1 $\alpha$  cannot bind to unfolded peptides in vitro raises the question of  
92 how monomers of IRE1 $\alpha$  can efficiently bind to misfolded proteins in cells during ER stress  
93 conditions (Gardner and Walter, 2011).

94

95 It has been challenging to determine which of these models is occurring in  
96 mammalian cells. One of the key requirements to test these different models is to monitor the  
97 endogenous oligomeric complexes of all three UPR sensors under homeostatic and ER stress  
98 conditions in cells. Although size fractionation assays to probe the oligomerization of UPR  
99 sensors were successful, they were laborious to test different time points of stress since it  
100 involves examining several fractionated samples. This approach is further complicated by the  
101 fact that all three UPR sensors are relatively low abundant proteins in cells. Thus, it is not  
102 feasible to detect these proteins in diluted size-fractionated samples. An imaging-based



103 approach that monitors ER stress dependent higher order oligomers (or clusters) proves to be  
104 useful for probing IRE1 $\alpha$  activation in both in yeast and human cells. However, there is less  
105 evidence for the ER stress-dependent cluster formation at the endogenous levels of IRE1 $\alpha$   
106 (Sundaram et al., 2017).

107  
108 Blue native poly acrylamide gel electrophoresis (BN-PAGE) immunoblotting has  
109 been successfully used to monitor the complex or oligomer formation of mitochondrial  
110 protein import machinery (Wittig et al., 2006). Recent studies have used BN PAGE to follow  
111 the dynamics of the Sec61 translocon complexes during the translocation into the ER lumen  
112 (Conti et al., 2011) and ligand-dependent oligomerization of NLRC4 inflammasome (Kofod  
113 and Vance 2011). We have recently used this approach to specifically monitor the role of the  
114 Sec61 translocon in controlling IRE1 $\alpha$  complexes (Sundaram et al., 2017). In the current  
115 study, we have employed this technique to investigate oligomerization dynamics of all three  
116 endogenous UPR sensors during ER stress. We found that all three UPR sensors existed as  
117 oligomeric complexes even under homeostatic conditions. BN-PAGE can robustly detect ER  
118 stress dependent changes in the oligomeric complexes of PERK and ATF6 $\alpha$ . While the  
119 endogenous oligomeric complexes of IRE1 $\alpha$  were not significantly changed during ER stress,  
120 a slight overexpression of IRE1 $\alpha$  exhibited oligomerization changes in an ER stress  
121 dependent manner. Surprisingly, depletion of BiP had less impact on the oligomeric  
122 complexes of UPR sensors. Also, overexpressing BiP did not affect the oligomeric complexes  
123 of UPR, but significantly reduced all three UPR sensors sensitivity to respond to the  
124 accumulation of misfolded proteins. Thus, our results find less evidence for the BiP-mediated  
125 activation of UPR sensors, but rather support that misfolded proteins binding to preformed  
126 oligomers of UPR sensors may be crucial for activation.

127

128

## 129 **Results**

130

### 131 **Changes in the endogenous complexes of UPR sensors under homeostatic and ER stress** 132 **conditions**

133 To monitor the changes in the endogenous complexes of IRE1 $\alpha$ , PERK or ATF6 $\alpha$  during  
134 homeostatic and ER stress conditions, we used a BN-PAGE immunoblotting procedure  
135 (Wittig et al., 2006; Sundaram et al., 2017). HEK293 cells were treated with thapsigargin  
136 (TG), which induces ER stress by inhibiting calcium transport into the ER, and prepared

137 digitonin lysates for BN-PAGE immunoblotting. The activation of the endogenous IRE1 $\alpha$   
138 was monitored by probing its phosphorylation status using a phos-tag based immunoblotting  
139 (Yang et al., 2009; Sundaram et al., 2017). A significant proportion of IRE1 $\alpha$  was activated  
140 after one hour of ER stress and inactivated within six hours of ER stress treatment (Figure  
141 1A). In accordance with previous studies (Lin et al., 2007; Sundaram et al., 2017), PERK was  
142 activated throughout the stress period as shown by its phosphorylation (Figure 1A). ATF6 $\alpha$   
143 was activated upon ER stress as shown by the loss of signal due to the proteolytic release of  
144 the N-terminal fragment after its migration to the Golgi apparatus (Figure 1A). Similar to  
145 IRE1 $\alpha$ , ATF6 $\alpha$  was robustly attenuated within eight hours of stress period since the full-  
146 length ATF6 $\alpha$  signal appeared back during the later hours of ER stress (Figure 1A).

147

148 Consistent with our previous findings (Sundaram et al., 2017), BN-PAGE  
149 immunoblotting revealed that IRE1 $\alpha$  existed as predominantly two complexes: ~480 kDa and  
150 ~720 kDa complexes. Changes in IRE1 $\alpha$  complexes were not apparent between unstressed  
151 and stressed cells, albeit the ~240kDa band become disappeared upon ER stress and appeared  
152 back in the later hours of ER stress (Figure 1B). ER stress dependent changes in PERK  
153 complexes were evident since PERK moved from a ~900 kDa complex to a ~1200 kDa  
154 complex upon ER stress (Figure 1C). BN-PAGE detected two large complexes of ATF6 $\alpha$   
155 under homeostatic conditions: ~720 kDa and ~1200 kDa, which were nearly disappeared  
156 during initial hours of ER stress and appeared back in the later hours of ER stress (Figure  
157 1D). To rule out the possibility that oligomerization changes of UPR sensors on BN-PAGE  
158 are specific to TG treatment, we performed BN-PAGE analysis with cells treated with DTT,  
159 which induces protein misfolding in the ER by blocking protein disulfide bond formation. All  
160 three UPR sensors were robustly activated in cells treated with DTT (Figure 1E). In line with  
161 TG treatment, there were no significant changes in IRE1 $\alpha$  complexes between unstressed and  
162 stressed cells (Figure 1F). Interestingly changes in PERK complexes were less noticeable  
163 with DTT treatment compared to TG treatment since not all the 900 kDa complex moved to  
164 the 1200 kDa complex (compare, Figure 1C and Figure 1G). ATF6 $\alpha$  signal was disappeared  
165 throughout DTT treatment, suggesting that the ER is experiencing continuous stress and is  
166 not restored (Figure 1F).

167

168 Since ATF6 $\alpha$  is proteolytically cleaved during ER stress, we were not able to detect  
169 the changes in ATF6 $\alpha$  complexes. Furthermore, our ATF6 $\alpha$  antibody failed to detect cleaved  
170 both N- and C-terminal fragments of ATF6 $\alpha$ . To determine the changes in ATF6 $\alpha$  complexes

171 during ER stress, we inhibited S1P and S2P proteases that are responsible for the cleavage of  
172 ATF6 $\alpha$  using a previously described serine protease inhibitor, 4-(2-aminoethyl) benzene  
173 sulfonyl fluoride hydrochloride (AEBSF) (Okada et al., 2003). In the presence of the  
174 inhibitor, ATF6 $\alpha$  cleavage was nearly abolished as shown by immunoblotting (Figure 1I,  
175 bottom). Interestingly, the larger complex of 1200 kDa band significantly reduced during ER  
176 stress, whereas little change occurred with the smaller complex of 720 kDa (Figure 1I),  
177 suggesting that ER stress dependent decreased oligomerization of ATF6 $\alpha$  is necessary for its  
178 transport to the Golgi apparatus.

179

180 Since all three UPR sensors appeared as large complexes on BN-PAGE, we wanted to  
181 exclude the possibility that the slow migration of UPR sensors on BN-PAGE was caused by  
182 their association with lipid or/and detergent micelles. We therefore tested the endogenous  
183 complexes of UPR sensors by a chemical crosslinking approach. HEK293 cells were treated  
184 with a cysteine reactive crosslinker and analyzed by a low percentage standard SDS PAGE  
185 immunoblotting. Remarkably, consistent with BN-PAGE data, all three UPR sensors entirely  
186 shifted to high molecular weight crosslinked adducts both in unstressed and stressed cells  
187 (Figure 1- figure supplement A, B, and C). Although BiP is a vastly abundant chaperone than  
188 all three UPR sensors, it showed significantly less crosslinked adducts compared to UPR  
189 sensors (Figure 1- figure supplement 1D). Given that the total protein profile did not  
190 significantly change with all concentrations of the crosslinker suggests that only stable  
191 oligomers like UPR sensors can be efficiently crosslinked at these concentrations (Figure 1-  
192 figure supplement 1E). For IRE1 $\alpha$  and ATF6 $\alpha$ , we do not expect to detect changes in  
193 crosslinked adducts between unstressed and stressed cells because the former did not change  
194 with stress on BN-PAGE, and the signal for the later mostly disappeared with stress.  
195 Interestingly, PERK also did not show any noticeable change in crosslinked adducts between  
196 unstressed and stressed cells (Figure 1- figure supplement 1B). The precise reason for this is  
197 unclear, but it is likely due to the limited resolution of the SDS PAGE to differentiate ~900  
198 kDa complex of PERK in unstressed cells from ~1200 kDa complex in stressed cells.  
199 Collectively, these results suggest that all three UPR sensors existed as preformed oligomeric  
200 complexes and become activated upon ER stress by changing the oligomerization status for  
201 both PERK and ATF6 $\alpha$ , but little to no change in IRE1 $\alpha$  oligomerization at the endogenous  
202 levels.

203

204

## 205 **Overexpression of IRE1 $\alpha$ exhibits ER stress dependent changes in its complexes**

206 Although ER stress dependent changes in UPR complexes were obvious for both PERK and  
207 ATF6 $\alpha$ , we were not able to detect changes in IRE1 $\alpha$  complexes. This was surprising to us  
208 since previous studies have suggested that stress dependent higher order oligomerization is  
209 important for IRE1 $\alpha$  activity (Li et al., 2010). We therefore increased the intensity of ER  
210 stress to detect changes in IRE1 $\alpha$  complexes. All three UPR sensors were robustly activated  
211 from low to high concentrations of DTT treatment (Figure 2A). Surprisingly, even at a high  
212 dosage of DTT treatment, we did not notice appreciable changes in IRE1 $\alpha$  complexes (Figure  
213 2A). However, the size of PERK complexes enhanced with increasing concentration of the  
214 stress, whereas ATF6 $\alpha$  signal disappeared at all concentrations of DTT treatment (Figure 2, C  
215 and D).

216

217 We hypothesized that ER stress dependent changes were not detected for IRE1 $\alpha$   
218 complexes since the concentration of the endogenous IRE1 $\alpha$  is extremely low to form higher  
219 order oligomers (Kulak et al., 2014). To test this, we used HEK293 IRE1 $\alpha$ <sup>-/-</sup> cells  
220 complemented with recombinant IRE1 $\alpha$ , expression of which is relatively higher than the  
221 endogenous IRE1 $\alpha$ , but it showed only a little constitutive activation under homeostatic  
222 conditions (Figure 2, E and F). In supporting our hypothesis, the overexpressed IRE1 $\alpha$   
223 exhibited an ER stress dependent change in its complexes on BN-PAGE since a large 1200  
224 kDa complex appeared with increasing concentrations of DTT (Figure 2G). By contrast to  
225 TG treatment, ER stress dependent change was less noticeable for PERK complexes, whereas  
226 ATF6 $\alpha$  signal disappeared upon treating with DTT (Figure 2, H and I). We next  
227 simultaneously compared the effect of TG or DTT treatment that had on recombinant IRE1 $\alpha$   
228 complexes. At low and high-stress treatment with either TG or DTT resulted in efficient  
229 activation of all three UPR sensors (Figure 2J). Consistent with our previous studies  
230 (Sundaram et al., 2017), ER stress dependent changes in recombinant IRE1 $\alpha$  complexes were  
231 not obvious under low-stress conditions with TG treatment, but a modest increase in the size  
232 of IRE1 $\alpha$  complexes occurred under high-stress conditions with TG treatment (Figure 2K).  
233 However, ER stress dependent increase in the size of recombinant IRE1 $\alpha$  complexes was  
234 conspicuous under both low and high-stress conditions with DTT treatment (Figure 2K). The  
235 size of PERK complexes increased under both under low and high-stress conditions with TG  
236 treatment, but their size increase was apparent with only high-stress conditions with DTT  
237 treatment (Figure 2L). As expected, ATF6 $\alpha$  complexes were responsive to both low and high-  
238 stress conditions as ATF6 $\alpha$  signal disappeared under both conditions (Figure 2M). Together

239 these results suggest that the activation of endogenous IRE1 $\alpha$  does not require a significant  
240 change in its oligomeric complexes.

241

### 242 **Depletion of BiP has little effects on complexes and activation of UPR sensors**

243 Since BN-PAGE can detect ER stress dependent changes in complexes of IRE1 $\alpha$ , PERK, or  
244 ATF6 $\alpha$ , we wanted to test the role of BiP in regulating oligomerization of these complexes in  
245 cells. Since BiP has been suggested to be a negative regulator by inhibiting the  
246 oligomerization and activation of UPR sensors (Okamura et al., 2000; Bertolotti et al., 2000),  
247 we expected that depletion of BiP might lead to significant changes in oligomeric complexes  
248 of UPR sensors in both unstressed and stressed cells. On the other hand, the depletion of  
249 Sec61 translocon would serve as a control since its depletion selectively changes IRE1 $\alpha$   
250 complexes as well as activates IRE1 $\alpha$  (Sundaram et al., 2017). We therefore transiently  
251 depleted BiP or the Sec61 translocon in cells using siRNA-mediated knockdown. Probing the  
252 phosphorylation status of IRE1 $\alpha$  and PERK revealed that a small amount of IRE1 $\alpha$  and  
253 PERK were activated in BiP depleted cells during unstressed conditions and that became  
254 fully activated upon ER stress (Figure 3A). Depletion of BiP appeared to have little to no  
255 effect on the cleavage of ATF6 $\alpha$  in unstressed as well as stressed cells relative to control  
256 siRNA depleted cells (Figure 3A). Consistent with the previous studies (Adamson et al.,  
257 2016), depletion of the Sec61 translocon selectively activated about 50% of IRE1 $\alpha$  in  
258 unstressed cells, and that became fully activated upon ER stress. While the depletion of the  
259 Sec61 translocon did not affect PERK, a significant loss of ATF6 $\alpha$  signal occurred relative to  
260 the control (Figure 3A). Since our ATF6 $\alpha$  antibodies only detect the uncleaved form of  
261 ATF6 $\alpha$ , we were not able to validate whether the loss of signal represented the activation of  
262 ATF6 $\alpha$  or the level of ATF6 $\alpha$  was reduced owing to the depletion of the Sec61. ATF6 $\alpha$  was  
263 also not efficiently activated in the Sec61 translocon depleted cells upon ER stress since it  
264 remains predominantly uncleaved upon ER stress (Figure 3A). Intriguingly, the levels of  
265 IRE1 $\alpha$  and PERK were slightly increased upon either depleting BiP or the Sec61 translocon  
266 in cells (Figure 3A).

267

268 BN-PAGE analysis of BiP depleted cells revealed no significant changes occurred  
269 with complexes of all three UPR sensors in both unstressed cells and stressed cells in  
270 comparison to control siRNA treated cells (Figure 3, B-D). Consistent with our recent studies  
271 (Sundaram et al., 2017), depletion of the Sec61 translocon led to an enrichment of 720 kDa  
272 complex of IRE1 $\alpha$  compared to control or BiP siRNA treated cells both under normal and

273 stress conditions (Figure 3B). In contrast, the Sec61 translocon depletion did not affect either  
274 PERK or ATF6 $\alpha$  complexes (Figure 3C, D). Unlike all three UPR sensors, BiP migrated as  
275 predominantly a single species ~140 kDa on BN-PAGE, whereas the Sec61 translocon ran  
276 predominantly as a ~140 kDa form as well as a ~350 kDa form, which is in agreement with  
277 previous studies (Figure 3E, F) (Conti et al., 2015; Sundaram et al., 2017). Together these  
278 data suggest that the depletion of BiP had minor effects on the complexes and activation of  
279 all three UPR sensors both under unstressed and stressed conditions.

280

### 281 **BiP overexpression does not impact complexes of UPR sensors but suppresses activation** 282 **of UPR sensors**

283 We next tested whether overexpression of BiP would reduce the size of UPR complexes as  
284 well as blocks the activation of UPR sensors. Consistent with the previous studies (Kohno et  
285 al., 1993; Bertolotti et al., 2000), overexpression of BiP above the endogenous level  
286 significantly suppressed the activation of IRE1 $\alpha$  as reflected by a significantly reduced  
287 phosphorylation of IRE1 $\alpha$  upon TG induced ER stress (Figure 4A). To our surprise, PERK  
288 was activated as shown by its phosphorylation status even in BiP overexpressing cells treated  
289 with TG, albeit slightly less efficient than the control. Interestingly, the ATF6 $\alpha$  protein level  
290 was about two-fold increased in BiP overexpressing cells and that the ER stress dependent  
291 cleavage of ATF6 $\alpha$  was nearly blocked (Figure 4A). BN PAGE analysis of IRE1 $\alpha$  in BiP  
292 overexpressing cells revealed that the overall pattern of IRE1 $\alpha$  complexes was not  
293 significantly affected in the presence or absence of the TG treatment (Figure 4B). However,  
294 we noticed a large complex (~1200 kDa) that specifically formed for IRE1 $\alpha$  upon BiP  
295 overexpression in a non-ER stress dependent manner. BiP overexpression also did not affect  
296 the size of PERK complexes in unstressed cells. Consistent with the activation data, PERK  
297 normally moved from a smaller complex to a large complex on BN-PAGE in BiP  
298 overexpressing cells upon treatment with TG (Figure 4, A and B). ATF6 $\alpha$  complexes were  
299 not affected by BiP overexpression in unstressed cells, but it blocked the disappearance of  
300 ATF6 $\alpha$  complexes upon ER stress (Figure 4D). These results were further corroborated by  
301 BiP overexpressing cells treated with DTT (Figure 4, E-H). Nevertheless, we observed one  
302 particular difference for PERK between TG and DTT treated cells. While the activation of  
303 PERK was not significantly affected by BiP overexpression in TG treated cells, it nearly  
304 blocked activation of PERK upon DTT treatment (Figure 4, E and G). Taken together, our  
305 data suggest that the overexpression of BiP does not impact the oligomeric complexes of all



306 three UPR sensors, but interferes with the activation of UPR sensors upon ER stress,  
307 presumably by sequestering misfolded proteins away from UPR sensors.

308

### 309 **IRE1 $\alpha$ can interact with misfolded proteins in cells**

310 The results above argue against the model that BiP binds to monomers of UPR sensors and  
311 inhibits constitutive oligomerization and activation. We therefore favour the model that  
312 misfolded proteins might bind and activate the preformed oligomeric complexes of UPR  
313 sensors, which would have a higher affinity for misfolded proteins. To support this model, we  
314 attempted to capture the interaction between the UPR sensors and misfolded proteins in the  
315 ER lumen. However, we failed to see the interaction by coimmunoprecipitation experiments.  
316 We reasoned that either the interaction is weak or it is sensitive to immunoprecipitation  
317 conditions. To circumvent this issue, we first expressed a misfolded alpha1-antitrypsin  
318 variant, null (Hong Kong) (NHK), into HEK293 IRE1 $\alpha$ -/- complemented with HA-tagged  
319 IRE1 $\alpha$  and induced ER stress with DTT. The cells were then treated with a reversible lysine  
320 reactive crosslinker. The crosslinked samples were immunoprecipitated for IRE1 $\alpha$  using an  
321 HA antibody. Indeed, we noticed an interaction between IRE1 $\alpha$  and misfolded antitrypsin  
322 (Figure 5A), which was slightly improved with ER stress. As previously reported (Bertolotti  
323 et al., 2000; Oikawa et al., 2009), we noticed an interaction between IRE1 $\alpha$  and BiP, which  
324 was reduced as the intensity of the stress increased (Figure 5A). We obtained a similar result  
325 when we treated cells with TG (Figure 5B). Thus, the interaction between misfolded  
326 antitrypsin and IRE1 $\alpha$  suggest that misfolded proteins bind and activate IRE1 $\alpha$  and likely  
327 other UPR sensors.

328

### 329 **Discussion**

330 In mammalian cells, three UPR branches, IRE1 $\alpha$ , PERK and ATF6 $\alpha$  become activated upon  
331 accumulation of misfolded proteins in the ER (Walter and Ron, 2011). Once activated, these  
332 UPR sensors initiate transcriptional and translational programs to improve the protein folding  
333 capacity of the ER. How these UPR sensors detect the accumulation of misfolded proteins,  
334 and how they become activated have been debated in the field (Snapp, 2012). In the first  
335 model, the luminal sensor domains of all three UPR sensors bind to BiP under homeostatic  
336 conditions (Bertolotti et al., 2000; Okamura et al., 2000; Shen et al., 2002; Carrara et al.,  
337 2005). As misfolded proteins accumulate during ER stress, BiP releases, and the UPR sensors  
338 become activated. In the second model, misfolded proteins directly bind and activate all three  
339 UPR sensors during ER stress (Gardner and Walter, 2011; Gardner et al., 2013). In both

340 models, oligomerization changes in UPR sensors appear to play a crucial role in activation.  
341 One critical barrier to test these different models is to reliably monitor the changes in  
342 oligomerization status of all three UPR sensors during ER stress conditions. In the present  
343 study, we have monitored all three UPR sensors side by side by employing a BN-PAGE  
344 immunoblotting technique. This method allows us to directly compare changes in complexes  
345 of all three UPR sensors in unstressed and stressed cells (Figure 5C).

346  
347 Our BN-PAGE data suggest that all three UPR sensors existed as preformed  
348 oligomers under homeostatic conditions. There are two alternative possibilities to this claim.  
349 First, it is likely that preformed oligomers of UPR sensors may reflect their interaction with  
350 their partner proteins in cells. Second, it is possible that the UPR sensors migrate slower in  
351 the BN-PAGE due to their association with lipids and detergent micelles, although all three  
352 sensors have only a single transmembrane domain. However, there are several of our  
353 observations argue against these alternative possibilities. First, our crosslinking data provide  
354 evidence that all three endogenous UPR sensors completely shifted to larger size crosslinked  
355 adducts upon chemical crosslinking, suggesting that they form stable oligomeric complexes.  
356 Second, BiP is a known interacting protein of all three UPR sensors, but its depletion does  
357 not result in any apparent changes in the size of UPR complexes, suggesting that interacting  
358 proteins of UPR sensors may not significantly impede their migration on BN-PAGE. Third,  
359 the fact that IRE1 $\alpha$  and to a lesser extent PERK with DTT treatment can be activated with no  
360 significant changes in oligomerization suggest that they are already in preformed oligomers  
361 since the monomeric form of IRE1 $\alpha$  is inactive (Zhou et al., 2006; Li et al., 2010).  
362 Furthermore, our BN-PAGE data with ATF6 $\alpha$  is consistent with previous studies that the  
363 ATF6 $\alpha$  appears to be in higher order oligomers under homeostatic conditions (Nadanaka et  
364 al. 2007; Gallagher et al., 2016).

365  
366 The endogenous IRE1 $\alpha$  complexes exhibit little changes upon activation by ER stress  
367 treatment even at high concentrations of DTT. This data is contrary to the current model that  
368 IRE1 $\alpha$  is proposed to be in monomers in unstressed cells and becomes oligomerized for  
369 activation upon ER stress (Kimata and Kohno, 2011; Hetz, 2012; Walter and Ron, 2011).  
370 It is unlikely that BN-PAGE cannot detect IRE1 $\alpha$  oligomerization status since it can  
371 apparently detect the oligomerization changes for PERK and ATF6 $\alpha$ . Moreover, ER stress  
372 dependent oligomerization changes for IRE1 $\alpha$  can be observed with a slight overexpression  
373 of IRE1 $\alpha$ . At present, it is unclear why the endogenous IRE1 $\alpha$  cannot be further oligomerized



374 upon ER stress. One possibility is that there are not sufficient oligomers of IRE1 $\alpha$  in the ER  
375 membrane to form higher order oligomers upon ER stress. Alternatively, unlike PERK and  
376 ATF6 $\alpha$ , the Sec61 translocon represses IRE1 $\alpha$  oligomerization, thereby attenuating IRE1 $\alpha$   
377 activity during ER stress (Plumb et al., 2015; Sundaram et al., 2017). However,  
378 overexpression of IRE1 $\alpha$  can form ER stress dependent higher order oligomers since the  
379 overexpression results in free IRE1 $\alpha$  oligomers that are not associated with Sec61 (Plumb et  
380 al., 2015). Interestingly, ER stress dependent changes in oligomerization of recombinant  
381 IRE1 $\alpha$  are apparent with DTT treatment, but less noticeable with TG treatment, suggesting  
382 that IRE1 $\alpha$  is more responsive to DTT treatment. While PERK is robustly oligomerized and  
383 activated by TG induced ER stress, it is slightly less sensitive to DTT induced  
384 oligomerization and activation, which is in agreement with the earlier studies (DuRose et al.,  
385 2006).

386

387 ATF6 $\alpha$  signal quickly returns within six hours of ER stress treatment, suggesting that  
388 the activation of ATF6 $\alpha$  is attenuated despite the presence of ER stress. In contrast to  
389 previous findings (Lin et al., 2007), ATF6 $\alpha$  inactivation rate is very similar to attenuation of  
390 IRE1 $\alpha$  signalling during ER stress. This discrepancy may be due to the use of heterologously  
391 expressed ATF6 $\alpha$  in the previous studies, which responds inefficiently to ER stress, whereas  
392 the endogenous ATF6 $\alpha$  in the current study and studies from the Mori group show a robust  
393 activation and inactivation to ER stress treatments (Okada et al., 2003). Unlike IRE1 $\alpha$  and  
394 PERK, changes in oligomerization of ATF6 $\alpha$  cannot easily be monitored since the loss of  
395 ATF6 $\alpha$  signal owing to the release of the cytosolic N-terminal domain of ATF6 $\alpha$  from its  
396 membrane anchor domain during ER stress. However, the inhibition of ATF6 $\alpha$  cleavage by  
397 AEBSF (Okada et al., 2003) proves to be a useful tool to monitor ER stress dependent  
398 conversion of two different ATF6 $\alpha$  oligomeric complexes to a single oligomeric complex. It  
399 remains to be determined whether the protease inhibitor has any secondary effects on the  
400 oligomerization of ATF6 $\alpha$ .

401

402 Our ability to monitor stress dependent changes in all three UPR sensors in parallel  
403 motivated us to test the role of BiP in inhibiting the oligomerization of these sensor proteins.  
404 According to this model, we predicted that the depletion of BiP should enhance the  
405 oligomerization of UPR sensors, whereas overexpression of BiP should reduce the size of  
406 UPR oligomers even under normal conditions. However, we found no significant changes in  
407 oligomerization of all three UPR sensors upon significant depletion of BiP in cells. This is

408 also further supported by our observation that all three UPR sensors are largely remain  
409 inactive upon BiP depletion. Furthermore, it is unclear why the depletion of BiP leads to  
410 slightly increased protein levels for IRE1 $\alpha$  and PERK. It is likely that BiP may be involved in  
411 the turnover of these UPR sensors since a recent study implicates BiP in the degradation of  
412 IRE1 $\alpha$  (Sun et al., 2015). It remains to be seen whether the residual amount of BiP in the  
413 depleted cells is sufficient to bind and suppress the activation of UPR sensors under  
414 homeostatic conditions.

415

416 Consistent with the previous studies, the overexpression of BiP effectively suppressed  
417 all three UPR sensors under DTT stress conditions (Kohno et al., 1993; Bertolotti et al.,  
418 2000). Surprisingly, PERK can still be activated by TG treatment, whereas the activation of  
419 IRE1 $\alpha$  and ATF6 $\alpha$  are suppressed. This result implies that PERK is the most sensitive arm of  
420 the UPR and such that it is also not easily attenuated during ER stress conditions.  
421 Furthermore, the overexpression BiP has no impact on reducing the size of oligomers of UPR  
422 sensors. Taken together, these results raise the question, how are UPR sensors activated? Our  
423 data point to the peptide-binding model (Credle et al., 2005), where UPR sensors are  
424 activated by directly binding to misfolded proteins (Figure 5C). Importantly, our findings of  
425 preformed oligomers of UPR sensors in unstressed cells may explain the robust nature of  
426 UPR response even at low levels of ER stress (Rutkowski et al., 2006) since oligomers of  
427 UPR sensors would have a higher affinity for misfolded proteins (Gardner et al., 2011). Our  
428 crosslinking data that captures the interaction between IRE1 $\alpha$  and a misfolded protein further  
429 support the peptide-binding model. However, it remains to be determined whether PERK and  
430 ATF6 $\alpha$  can also interact with misfolded proteins. In this model, the interaction between UPR  
431 sensors and BiP might play an important role by increasing the local BiP concentration  
432 around UPR sensors, thus preventing inappropriate activation during homeostatic conditions.  
433 Future studies should focus on how binding of misfolded proteins could activate UPR sensors  
434 using assays that use physiological concentration of purified full-length UPR sensor proteins.  
435 It is also necessary to consider using different misfolded substrates for binding studies with  
436 UPR sensors since each UPR sensor may prefer different misfolded substrates.

437

## 438 **Materials and methods**

439

### 440 **Antibodies and Reagents:**

441 Antibodies were purchased: anti-IRE1 $\alpha$  (3294, Cell Signaling, RRID:AB\_823545), anti-  
442 PERK (3192, Cell Signaling, RRID:AB\_2095847), anti-IRE1 $\alpha$  (20790, Santa Cruz,  
443 RRID:AB\_2098712 ), anti-Tubulin (ab7291, Abcam, RRID:AB\_2241126), anti-BiP/GRP78  
444 (610979, BD Biosciences, RRID:AB\_398292). Anti-HA, anti-Sec61 $\alpha$ , and anti-GFP were a  
445 gift from Dr. Ramanujan Hegde. Anti-mouse Goat HRP (11-035-003, Jackson  
446 Immunoreserach), anti-rabbit Goat HRP (111-035-003, Jackson Immunoreserach, RRID:  
447 AB\_2313567), and anti-HA magnetic beads (88836, Fisher scientific).

448

449 Reagents were purchased: DMEM (10-013-CV, Corning), FBS (89510-186, VWR),  
450 Penicillin/Streptomycin (15140122, Gibco), Lipofectamine 2000 (11668019, Invitrogen),  
451 Doxycycline (631311, Clontech), AEBSF (A8456, Sigma), TG (BML-PE180-0005, Enzo  
452 Life Sciences), Tunicamycin (T7765, Sigma), BMH (bismaleimido-hexane) (22330,  
453 ThermoFisher), DSP (dithiobis(succinimidyl propionate)) (22585, ThermoFisher) Protease  
454 inhibitor cocktail (11873580001, Roche), Digitonin (300410, EMD Millipore), Phos-tag  
455 (300-93523, Wako), 3-12% BN-PAGE Novex Bis-Tris Gel (BN1003BOX, Invitrogen),  
456 SuperSignal West Pico or Femto Substrate (34080 or 34095, Thermo Scientific). All other  
457 common reagents were purchased as indicated in the method section.

458

#### 459 **Cell culture and ER stress treatment**

460 HEK 293-Flp-In T-Rex cells were cultured in high glucose DMEM (Corning) containing  
461 10% FBS (Gibco), 100 U/ml penicillin and 100  $\mu$ g/ml streptomycin (Gibco) at 5% CO<sub>2</sub>.  
462 IRE1 $\alpha$  $\alpha$ -/- HEK293-Flp-In T-Rex cells and IRE1 $\alpha$  complemented cells were previously  
463 described (Plumb et al., 2015). The cells were transfected with plasmid or siRNA oligos  
464 using Lipofectamine 2000 according to manufacturer's protocol. For ER stress treatment,  
465 HEK293 cells were counted and plated in 6 well plates ( $1.5 \times 10^6$ ) and grown overnight. The  
466 cells were then treated with either DTT or TG. All the concentrations and treatment time  
467 were as indicated in either result or figure sections.

468

469 For the depletion experiments,  $0.5 \times 10^6$  cells were plated and transfected next day  
470 with either BiP siRNA (GGAGCGCAUUGAUACUAGA) or Sec61 $\alpha$  siRNA (Plumb et al.,  
471 2015). After 24 hours of first transfections, cells were again transfected with siRNA oligos.  
472 After 72 hours of the first transfection, cells were treated with TG as indicated in the figure  
473 legends. For BiP expression experiment,  $0.5 \times 10^6$  cells were plated and grown overnight.  
474 The cells were then transfected with transfected with rat BiP plasmid (a kind gift from Dr.

475 Ramanujan Hegde) or empty vector. After 24 hours of transfection, cells were treated with  
476 ER stress inducers as mentioned in the figure legends. After the treatment, cells were washed  
477 with 1xPBS, harvested in 1.2ml 1xPBS. The cells were spun at 10,000g for 1 minute, and the  
478 pellets were flash frozen and stored at -80C.

479

#### 480 **Chemical crosslinking**

481 HEK293 cells were plated on six well plates ( $0.75 \times 10^6$  cells/ well) and grown overnight.  
482 The cells were either left untreated or treated with 5 $\mu$ g TG/ml for 60 minutes. After the  
483 treatment, the cells were washed once with KHM buffer (20mM HEPES pH 7.4, 110mM  
484 NaCl, 2mM MgAc) and permeabilized with 0.005% Digitonin for 5min on ice. The digitonin  
485 buffer was removed and washed once with KHM buffer. Subsequently, the permeabilized  
486 cells on plates were treated with 0.5 to 10 $\mu$ M BMH in KHM buffer for 30 minutes on ice.  
487 The cells were directly harvested in 2X SDS sample buffer, boiled, separated on 6% Tris-  
488 Glycine based gels and immunoblotted with the indicated antibodies in the Figure S1.

489

490 For DSP crosslinking, HEK293 IRE1 $\alpha$ -/- cells complemented with IRE1 $\alpha$ -HA were plated on  
491 six well plates ( $0.75 \times 10^6$  / well). The cells were then transfected with NHK  $\alpha$  1 antitrypsin  
492 plasmid (a Kind gift from Dr. Peter Cresswell) and induced with 10 ng of Doxycycline to  
493 drive the expression of IRE1 $\alpha$ -HA. After 24 hours of transfection, the cells were washed with  
494 KHM and treated with 1mM DSP for 30 minutes at room temperature. The crosslinking  
495 reaction was then quenched with 0.1M Tris pH 8.0 for 15 min and harvested in RIPA buffer  
496 by incubating for 30 minutes in the cold room. The cell lysates were centrifuged at 18,500g  
497 for 15 min at 4°C. The supernatant was incubated with anti-HA magnetic beads for 2 hours at  
498 4°C, washed, eluted with 2X SDS sample buffer and processed for immunoblotting with the  
499 indicated antigens in the figure.

500

#### 501 **BN-PAGE Immunoblotting**

502 The cell pellets were lysed using 2% digitonin buffer (50mM BisTris pH 7.2, 1x protease  
503 inhibitor cocktail [Roche], 100mM NaCl and 10% Glycerol) for 45 minutes. The cell lysates  
504 were then diluted to a final concentration of 1% digitonin and 50mM NaCl and centrifuged at  
505 18,500g for 20 minutes at 4°C. The supernatant was collected and mixed with BN-PAGE  
506 sample buffer (Invitrogen) and 5% G520 (Sigma).

507

508 The samples were run using 3-12% BN-PAGE Novex Bis-Tris (Invitrogen) gel at 150 V for 1  
509 hour with the dark blue buffer (50mM Tricine pH 7, 50mM BisTris pH 7 and 0.02% G250) at  
510 room temperature. The dark blue buffer was then exchanged with the light blue buffer  
511 (50mM Tricine pH 7, 50mM BisTris pH 7 and 0.002% G250) for 4 hours in the cold room.  
512 To probe BiP, the gels were run for 1 hour with the dark blue buffer at room temperature and  
513 3 hours with the light blue buffer in the cold room. After electrophoresis, the gel was gently  
514 shaken in 1x Tris-Glycine-SDS transfer buffer for 20 minutes to remove the residual blue  
515 dye. The transfer was performed using PVDF membrane (EMD Millipore) for 1 hour and 30  
516 minutes at 85V. After transfer, the membrane was fixed with 4% acetic acid and followed  
517 with a standard immuno blotting procedure.

518

### 519 **Phostag assay**

520 IRE1 $\alpha$  phosphorylation was detected by previously described method (Yang et al., 2010).  
521 Briefly, 5% SDS PAGE gel was made containing 25 $\mu$ M Phos-tag (Wako). SDS-PAGE was  
522 run at 100 V for 2 hours and 40 minutes. The gel was transferred to nitrocellulose (Bio-Rad)  
523 and followed with immunoblotting.

524

### 525 **Acknowledgement**

526 We thank Mariappan lab for useful discussions. We thank Sha Sun for providing comments  
527 on the manuscript. A.S. was supported by the Rudolph J. Anderson Postdoctoral Fellowship.  
528 This work is supported by the Yale School of Medicine start-up package and NIH  
529 1R01GM11738601.

530

531

### 532 **References**

533 Adamson, B., T.M. Norman, M. Jost, M.Y. Cho, J.K. Nunez, Y. Chen, J.E. Villalta, L.A.  
534 Gilbert, M.A. Horlbeck, M.Y. Hein, R.A. Pak, A.N. Gray, C.A. Gross, A. Dixit, O. Parnas,  
535 A. Regev, and J.S. Weissman. 2016. A Multiplexed Single-Cell CRISPR Screening Platform  
536 Enables Systematic Dissection of the Unfolded Protein Response. *Cell*. 167:1867-1882  
537 e1821.  
538  
539 Ameri, K., and A.L. Harris. 2008. Activating transcription factor 4. *Int J Biochem Cell Biol*.  
540 40:14-21.

541

542 Anckar, J., and L. Sistonen. 2011. Regulation of HSF1 function in the heat stress response:  
543 implications in aging and disease. *Annu Rev Biochem.* 80:1089-1115.  
544

545 Aragon, T., E. van Anken, D. Pincus, I.M. Serafimova, A.V. Korennykh, C.A. Rubio, and P.  
546 Walter. 2009. Messenger RNA targeting to endoplasmic reticulum stress signalling sites.  
547 *Nature.* 457:736-740.  
548

549 Arsene, F., T. Tomoyasu, and B. Bukau. 2000. The heat shock response of *Escherichia coli*.  
550 *Int J Food Microbiol.* 55:3-9.  
551

552 Bertolotti, A., Y. Zhang, L.M. Hendershot, H.P. Harding, and D. Ron. 2000. Dynamic  
553 interaction of BiP and ER stress transducers in the unfolded-protein response. *Nat Cell Biol.*  
554 2:326-332.  
555

556 Brodsky, J.L. 2012. Cleaning up: ER-associated degradation to the rescue. *Cell.* 151:1163-  
557 1167.  
558

559 Calfon, M., H. Zeng, F. Urano, J.H. Till, S.R. Hubbard, H.P. Harding, S.G. Clark, and D.  
560 Ron. 2002. IRE1 $\alpha$  couples endoplasmic reticulum load to secretory capacity by processing  
561 the XBP-1 mRNA. *Nature.* 415:92-96.  
562

563 Carrara, M., F. Prischi, P.R. Nowak, M.C. Kopp, and M.M. Ali. 2015. Noncanonical binding  
564 of BiP ATPase domain to Ire1 and Perk is dissociated by unfolded protein CH1 to initiate ER  
565 stress signaling. *Elife.* 4.  
566

567 Christianson, J.C., and Y. Ye. 2014. Cleaning up in the endoplasmic reticulum: ubiquitin in  
568 charge. *Nat Struct Mol Biol.* 21:325-335.  
569

570 Conti, B.J., P.K. Devaraneni, Z. Yang, L.L. David, and W.R. Skach. 2015. Cotranslational  
571 stabilization of Sec62/63 within the ER Sec61 translocon is controlled by distinct substrate-  
572 driven translocation events. *Mol Cell.* 58:269-283.  
573

574 Cox, J.S., C.E. Shamu, and P. Walter. 1993. Transcriptional induction of genes encoding  
575 endoplasmic reticulum resident proteins requires a transmembrane protein kinase. *Cell*.  
576 73:1197-1206.  
577

578 Credle, J.J., J.S. Finer-Moore, F.R. Papa, R.M. Stroud, and P. Walter. 2005. On the  
579 mechanism of sensing unfolded protein in the endoplasmic reticulum. *Proc Natl Acad Sci U*  
580 *S A*. 102:18773-18784.  
581

582 DuRose, J.B., A.B. Tam, and M. Niwa. 2006. Intrinsic capacities of molecular sensors of the  
583 unfolded protein response to sense alternate forms of endoplasmic reticulum stress. *Mol Biol*  
584 *Cell*. 17:3095-3107.  
585

586 Ellgaard, L., and A. Helenius. 2003. Quality control in the endoplasmic reticulum. *Nat Rev*  
587 *Mol Cell Biol*. 4:181-191.  
588

589 Gallagher, C.M., and P. Walter. 2016. Ceapins inhibit ATF6 $\alpha$  signaling by selectively  
590 preventing transport of ATF6 $\alpha$  to the Golgi apparatus during ER stress. *Elife*. 5.  
591

592 Gardner, B.M., D. Pincus, K. Gotthardt, C.M. Gallagher, and P. Walter. 2013. Endoplasmic  
593 reticulum stress sensing in the unfolded protein response. *Cold Spring Harb Perspect Biol*.  
594 5:a013169.  
595

596 Gardner, B.M., and P. Walter. 2011. Unfolded proteins are Ire1-activating ligands that  
597 directly induce the unfolded protein response. *Science*. 333:1891-1894.  
598

599 Han, D., A.G. Lerner, L. Vande Walle, J.P. Upton, W. Xu, A. Hagen, B.J. Backes, S.A.  
600 Oakes, and F.R. Papa. 2009. IRE1 $\alpha$  kinase activation modes control alternate  
601 endoribonuclease outputs to determine divergent cell fates. *Cell*. 138:562-575.  
602

603 Harding, H.P., Y. Zhang, and D. Ron. 1999. Protein translation and folding are coupled by an  
604 endoplasmic-reticulum-resident kinase. *Nature*. 397:271-274.  
605



- 606 Haze, K., H. Yoshida, H. Yanagi, T. Yura, and K. Mori. 1999. Mammalian transcription  
607 factor ATF6 $\alpha$  is synthesized as a transmembrane protein and activated by proteolysis in  
608 response to endoplasmic reticulum stress. *Mol Biol Cell*. 10:3787-3799.
- 609
- 610 Hetz, C. 2012. The unfolded protein response: controlling cell fate decisions under ER stress  
611 and beyond. *Nat Rev Mol Cell Biol*. 13:89-102.
- 612
- 613 Hollien, J., and J.S. Weissman. 2006. Decay of endoplasmic reticulum-localized mRNAs  
614 during the unfolded protein response. *Science*. 313:104-107.
- 615
- 616 Hollien J, Lin JH, Li H, Stevens N, Walter P, Weissman JS. 2009. Regulated Ire1-dependent decay of  
617 messenger RNAs in mammalian cells. *J Cell Biol*. 186(3):323-31.
- 618
- 619 Kimata, Y., Y. Ishiwata-Kimata, T. Ito, A. Hirata, T. Suzuki, D. Oikawa, M. Takeuchi, and  
620 K. Kohno. 2007. Two regulatory steps of ER-stress sensor Ire1 involving its cluster formation  
621 and interaction with unfolded proteins. *J Cell Biol*. 179:75-86.
- 622
- 623 Kimata, Y., and K. Kohno. 2011. Endoplasmic reticulum stress-sensing mechanisms in yeast  
624 and mammalian cells. *Curr Opin Cell Biol*. 23:135-142.
- 625
- 626 Kimata, Y., D. Oikawa, Y. Shimizu, Y. Ishiwata-Kimata, and K. Kohno. 2004. A role for BiP  
627 as an adjustor for the endoplasmic reticulum stress-sensing protein Ire1. *J Cell Biol*. 167:445-  
628 456.
- 629
- 630 Kofoed, E.M., and R.E. Vance. 2011. Innate immune recognition of bacterial ligands by  
631 NAIPs determines inflammasome specificity. *Nature*. 477:592-595.
- 632
- 633 Korennykh, A.V., P.F. Egea, A.A. Korostelev, J. Finer-Moore, C. Zhang, K.M. Shokat, R.M.  
634 Stroud, and P. Walter. 2009. The unfolded protein response signals through high-order  
635 assembly of Ire1. *Nature*. 457:687-693.
- 636
- 637 Kulak, N.A., G. Pichler, I. Paron, N. Nagaraj, and M. Mann. 2014. Minimal, encapsulated  
638 proteomic-sample processing applied to copy-number estimation in eukaryotic cells. *Nat*  
639 *Methods*. 11:319-324.



640

641 Lee, A.H., N.N. Iwakoshi, and L.H. Glimcher. 2003. XBP-1 regulates a subset of  
642 endoplasmic reticulum resident chaperone genes in the unfolded protein response. *Mol Cell*  
643 *Biol.* 23:7448-7459.

644

645 Li, H., A.V. Korennykh, S.L. Behrman, and P. Walter. 2010. Mammalian endoplasmic  
646 reticulum stress sensor IRE1 $\alpha$  signals by dynamic clustering. *Proc Natl Acad Sci U S A.*  
647 107:16113-16118.

648

649 Lin, J.H., H. Li, D. Yasumura, H.R. Cohen, C. Zhang, B. Panning, K.M. Shokat, M.M.  
650 Lavail, and P. Walter. 2007. IRE1 $\alpha$  signaling affects cell fate during the unfolded protein  
651 response. *Science.* 318:944-949.

652

653 Mori, K., W. Ma, M.J. Gething, and J. Sambrook. 1993. A transmembrane protein with a  
654 cdc2+/CDC28-related kinase activity is required for signaling from the ER to the nucleus.  
655 *Cell.* 74:743-756.

656

657 Nadanaka, S., T. Okada, H. Yoshida, and K. Mori. 2007. Role of disulfide bridges formed in  
658 the luminal domain of ATF6 $\alpha$  in sensing endoplasmic reticulum stress. *Mol Cell Biol.*  
659 27:1027-1043.

660

661 Oikawa, D., Y. Kimata, and K. Kohno. 2007. Self-association and BiP dissociation are not  
662 sufficient for activation of the ER stress sensor Ire1. *J Cell Sci.* 120:1681-1688.

663

664 Oikawa, D., Y. Kimata, K. Kohno, and T. Iwawaki. 2009. Activation of mammalian  
665 IRE1 $\alpha$  upon ER stress depends on dissociation of BiP rather than on direct interaction  
666 with unfolded proteins. *Exp Cell Res.* 315:2496-2504.

667

668 Oikawa, D., A. Kitamura, M. Kinjo, and T. Iwawaki. 2012. Direct association of unfolded  
669 proteins with mammalian ER stress sensor, IRE1 $\alpha$ beta. *PLoS One.* 7:e51290.

670

671 Okada, T., K. Haze, S. Nadanaka, H. Yoshida, N.G. Seidah, Y. Hirano, R. Sato, M. Negishi,  
672 and K. Mori. 2003. A serine protease inhibitor prevents endoplasmic reticulum stress-induced

673 cleavage but not transport of the membrane-bound transcription factor ATF6 $\alpha$ . *J Biol Chem.*  
674 278:31024-31032.  
675  
676 Okamura, K., Y. Kimata, H. Higashio, A. Tsuru, and K. Kohno. 2000. Dissociation of  
677 Kar2p/BiP from an ER sensory molecule, Ire1p, triggers the unfolded protein response in  
678 yeast. *Biochem Biophys Res Commun.* 279:445-450.  
679  
680 Pincus, D., M.W. Chevalier, T. Aragon, E. van Anken, S.E. Vidal, H. El-Samad, and P.  
681 Walter. 2010. BiP binding to the ER-stress sensor Ire1 tunes the homeostatic behavior of the  
682 unfolded protein response. *PLoS Biol.* 8:e1000415.  
683  
684 Plumb, R., Z.R. Zhang, S. Appathurai, and M. Mariappan. 2015. A functional link between  
685 the co-translational protein translocation pathway and the UPR. *Elife.* 4.  
686  
687 Rapoport, T.A. 2007. Protein translocation across the eukaryotic endoplasmic reticulum and  
688 bacterial plasma membranes. *Nature.* 450:663-669.  
689  
690 Rutkowski, D.T., S.M. Arnold, C.N. Miller, J. Wu, J. Li, K.M. Gunnison, K. Mori, A.A.  
691 Sadighi Akha, D. Raden, and R.J. Kaufman. 2006. Adaptation to ER stress is mediated by  
692 differential stabilities of pro-survival and pro-apoptotic mRNAs and proteins. *PLoS Biol.*  
693 4:e374.  
694  
695 Schindler, A.J., and R. Schekman. 2009. In vitro reconstitution of ER-stress induced ATF6 $\alpha$   
696 transport in COPII vesicles. *Proc Natl Acad Sci U S A.* 106:17775-17780.  
697  
698 Schuldiner, M., S.R. Collins, N.J. Thompson, V. Denic, A. Bhamidipati, T. Punna, J. Ihmels,  
699 B. Andrews, C. Boone, J.F. Greenblatt, J.S. Weissman, and N.J. Krogan. 2005. Exploration  
700 of the function and organization of the yeast early secretory pathway through an epistatic  
701 miniarray profile. *Cell.* 123:507-519.  
702  
703 Schwanhausser, B., D. Busse, N. Li, G. Dittmar, J. Schuchhardt, J. Wolf, W. Chen, and M.  
704 Selbach. 2011. Global quantification of mammalian gene expression control. *Nature.*  
705 473:337-342.  
706

707 Shen, J., X. Chen, L. Hendershot, and R. Prywes. 2002. ER stress regulation of ATF6 $\alpha$   
708 localization by dissociation of BiP/GRP78 binding and unmasking of Golgi localization  
709 signals. *Dev Cell*. 3:99-111.  
710

711 Shoulders, M.D., L.M. Ryno, J.C. Genereux, J.J. Moresco, P.G. Tu, C. Wu, J.R. Yates, 3rd,  
712 A.I. Su, J.W. Kelly, and R.L. Wiseman. 2013. Stress-independent activation of XBP1s and/or  
713 ATF6 $\alpha$  reveals three functionally diverse ER proteostasis environments. *Cell Rep*. 3:1279-  
714 1292.  
715

716 Snapp, E.L. 2012. Unfolded protein responses with or without unfolded proteins? *Cells*.  
717 1:926-950.  
718

719 Sood, R., A.C. Porter, K. Ma, L.A. Quilliam, and R.C. Wek. 2000. Pancreatic eukaryotic  
720 initiation factor-2 $\alpha$  kinase (PEK) homologues in humans, *Drosophila melanogaster* and  
721 *Caenorhabditis elegans* that mediate translational control in response to endoplasmic  
722 reticulum stress. *Biochem J*. 346 Pt 2:281-293.  
723

724 Sun, S., G. Shi, H. Sha, Y. Ji, X. Han, X. Shu, H. Ma, T. Inoue, B. Gao, H. Kim, P. Bu, R.D.  
725 Guber, X. Shen, A.H. Lee, T. Iwawaki, A.W. Paton, J.C. Paton, D. Fang, B. Tsai, J.R. Yates,  
726 3rd, H. Wu, S. Kersten, Q. Long, G.E. Duhamel, K.W. Simpson, and L. Qi. 2015.  
727 IRE1 $\alpha$  is an endogenous substrate of endoplasmic-reticulum-associated degradation.  
728 *Nat Cell Biol*. 17:1546-1555.  
729

730 Sundaram, A., R. Plumb, S. Appathurai, and M. Mariappan. 2017. The Sec61 translocon  
731 limits IRE1 $\alpha$  signaling during the unfolded protein response. *Elife*. 6.  
732

733 van Anken, E., and I. Braakman. 2005. Versatility of the endoplasmic reticulum protein  
734 folding factory. *Crit Rev Biochem Mol Biol*. 40:191-228.  
735

736 Walter, P., and D. Ron. 2011. The unfolded protein response: from stress pathway to  
737 homeostatic regulation. *Science*. 334:1081-1086.  
738

739 Wang, M., and R.J. Kaufman. 2016. Protein misfolding in the endoplasmic reticulum as a  
740 conduit to human disease. *Nature*. 529:326-335.

741  
742 Wittig, I., H.P. Braun, and H. Schagger. 2006. Blue native PAGE. *Nat Protoc.* 1:418-428.  
743  
744 Yang, L., Z. Xue, Y. He, S. Sun, H. Chen, and L. Qi. 2010. A Phos-tag-based approach  
745 reveals the extent of physiological endoplasmic reticulum stress. *PLoS One.* 5:e11621.  
746  
747 Ye, J., R.B. Rawson, R. Komuro, X. Chen, U.P. Dave, R. Prywes, M.S. Brown, and J.L.  
748 Goldstein. 2000. ER stress induces cleavage of membrane-bound ATF6 $\alpha$  by the same  
749 proteases that process SREBPs. *Mol Cell.* 6:1355-1364.  
750  
751 Yoshida, H., T. Matsui, A. Yamamoto, T. Okada, and K. Mori. 2001. XBP1 mRNA is  
752 induced by ATF6 $\alpha$  and spliced by IRE1 $\alpha$  in response to ER stress to produce a highly active  
753 transcription factor. *Cell.* 107:881-891.  
754  
755 Zhou, J., C.Y. Liu, S.H. Back, R.L. Clark, D. Peisach, Z. Xu, and R.J. Kaufman. 2006. The  
756 crystal structure of human IRE1 $\alpha$  luminal domain reveals a conserved dimerization interface  
757 required for activation of the unfolded protein response. *Proc Natl Acad Sci U S A.*  
758 103:14343-14348.

759

## 760 **Figure legends**

761

762 **Figure 1. Changes in the endogenous complexes of IRE1 $\alpha$ , PERK and ATF6 $\alpha$  during**  
763 **ER stress.** (A) HEK293 cells were treated with 7.5 $\mu$ g of thapsigargin (TG) for the indicated  
764 time points and lysed with digitonin. The lysates were separated by SDS PAGE and  
765 immunoblotting for the indicated proteins. A phos-tag based immunoblotting was performed  
766 for probing phosphorylated IRE1 $\alpha$ . (B) The digitonin lysates from A were analyzed by BN-  
767 PAGE immunoblotting with IRE1 $\alpha$  antibodies, (C) PERK antibodies, or (D) ATF6 $\alpha$   
768 antibodies. (E-H) HEK293 cells were treated with 5mM DTT for the indicated time points  
769 and analyzed as in (A-D). (I) HEK293 cells were pretreated with a serine protease inhibitor  
770 AEBSF (250 $\mu$ M) for 1hr and subsequently treated with DTT at the indicated time to induce  
771 ER stress. The digitonin lysates were analyzed as in A and D. Experiments shown are  
772 representative of experiments repeated at least two times during different days.

773

774 **Figure 2. Overexpressed IRE1 $\alpha$ , but not the endogenous IRE1 $\alpha$ , exhibits ER stress**  
775 **induced changes in its complexes.**

776 (A) HEK293 cells were treated with the indicated concentrations of DTT for 2.5 hours and  
777 analyzed for immunoblotting with the indicated antigens. (B-D) The samples from A were  
778 analyzed by BN-PAGE immunoblotting and probed for the indicated antigens. (E) An  
779 immunoblot comparing the expression levels between the endogenous IRE1 $\alpha$  in HEK293 and  
780 IRE1 $\alpha$ -HA complemented into HEK293 IRE1 $\alpha$ <sup>-/-</sup> cells. (F) HEK293 IRE1 $\alpha$ <sup>-/-</sup> complemented  
781 IRE1 $\alpha$ -HA cells were treated with increasing concentration of DTT for 2.5 hrs and analyzed  
782 by immunoblotting for the indicated antigens. (G-I) The samples from F were analyzed by  
783 BN-PAGE immunoblotting and probed for the indicated antigens. (J) HEK293 IRE1 $\alpha$ <sup>-/-</sup>  
784 complemented IRE1 $\alpha$ -HA cells were induced with either low stress by treating with a low  
785 concentration of TG (2.5 $\mu$ g/ml) or DTT (2mM) or high stress by treating with a high  
786 concentration of TG (25 $\mu$ g) or DTT (30mM) for 2.5 hours. The cell lysates were analyzed by  
787 standard immunoblotting for the indicated antigens. (K-M) The samples from J were  
788 analyzed by BN-PAGE immunoblotting for the indicated antigens. Most of the experiments  
789 shown are representative of experiments repeated at least two times during different days.  
790

791 **Figure 3. Depletion of BiP neither affects complexes or activation of all three UPR**  
792 **sensors**

793 (A) HEK293 cells were transfected with siRNA oligos directed against either BiP siRNA or  
794 Sec61 $\alpha$  for two consecutive days. After 72 hours of transfection, the cells were treated with  
795 2.5 $\mu$ g of TG for the indicated time points and analyzed by immunoblotting for the indicated  
796 antigens. (B-F) The samples from A were analyzed by BN-PAGE immunoblotting for the  
797 indicated antigens. Experiments shown are representative of experiments repeated at least  
798 two times during different days.  
799

800 **Figure 4. Overexpression of BiP has little effects on complexes of IRE1 $\alpha$ , PERK, and**  
801 **ATF6 $\alpha$**

802 (A) HEK293 cells were transfected with either an empty plasmid (control) or plasmid  
803 encoding BiP. After 16 hours of transfection, media was replenished and grown for another  
804 24 hrs. The cells were treated with the indicated concentrations of TG for 2 hrs. The cells  
805 were harvested and analyzed by immunoblotting for the indicated antigens. (B-D) The  
806 samples from A were analyzed by BN-PAGE immunoblotting for the indicated proteins. (E)  
807 As in A, the cells were transfected with either an empty plasmid or plasmid encoding BiP and

808 treated with the indicated concentrations of DTT for 2 hrs. The cells were harvested and  
809 analyzed by immunoblotting for the indicated antigens. (F-H) The samples from E were  
810 analyzed by BN-PAGE immunoblotting for the indicated proteins. Experiments shown are  
811 representative of experiments repeated at least two times during different days.

812

813 **Figure 5. The UPR sensor IRE1 $\alpha$  interacts with misfolded antitrypsin**

814 (A) HEK293 IRE1 $\alpha$ <sup>-/-</sup> cells complemented with IRE1 $\alpha$ -HA were transfected with either  
815 empty plasmid or NHK  $\alpha$ 1 antitrypsin and induced with 10 ng of doxycycline to drive the  
816 expression of IRE1 $\alpha$ -HA. After 24 hrs of transfection, the cells were reacted with DSP  
817 crosslinker (XL). As a control, HEK293 cells transfected NHK  $\alpha$ 1 antitrypsin and treated  
818 with the crosslinker. The crosslinked samples were immunoprecipitated with anti-HA  
819 magnetic antibodies and analyzed by immunoblotting with the indicated antibodies. (B) The  
820 procedure was identical to A, but the cells were treated with 5 $\mu$ g TG for 1 hr before  
821 crosslinking. Experiments shown are representative of experiments repeated at least two  
822 times during different days. (C) Models for oligomerization and activation of UPR sensors.  
823 Step 1: All three endogenous UPR sensors exist as preformed oligomers associated with BiP  
824 in cells. Step 2: Upon ER stress, oligomers of UPR sensors bind to misfolded proteins with  
825 concomitant release of BiP from UPR sensors. Step 3: Once binding to misfolded proteins,  
826 IRE1 $\alpha$  may undergo conformational changes without major changes in the oligomerization  
827 state, which in turn activates its kinase and RNase activities. PERK is activated and  
828 phosphorylated through assembling into large oligomers from small oligomers upon binding  
829 with misfolded proteins. Conversely, misfolded proteins binding to ATF6 $\alpha$  oligomers induce  
830 disassembly of oligomers, thus migrating to Golgi for activation.

831

832 **Figure 1- figure supplement 1: Chemical crosslinking of UPR sensors in cells**

833 (A-E) HEK293 cells were either left untreated or treated with 5 $\mu$ g TG/ml for 60 min. After  
834 the treatment, the cells were permeabilized with a low concentration of Digitonin.  
835 Subsequently, the permeabilized cells were treated with 0.5 to 10 $\mu$ M BMH for 30 min on ice.  
836 The cells were directly harvested and analyzed by either immunoblotting with the indicated  
837 antigens or coomassie blue staining.

**A**

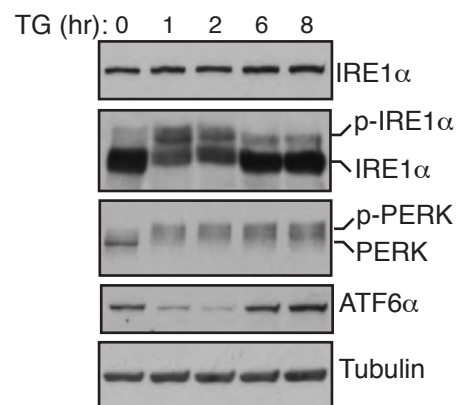

**B**

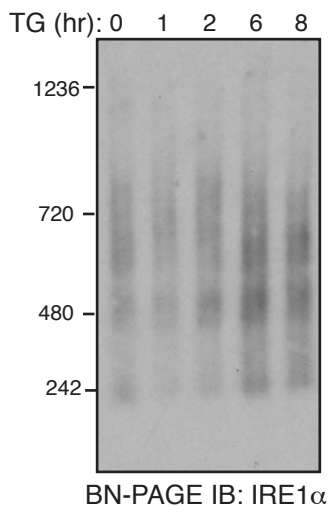

**C**

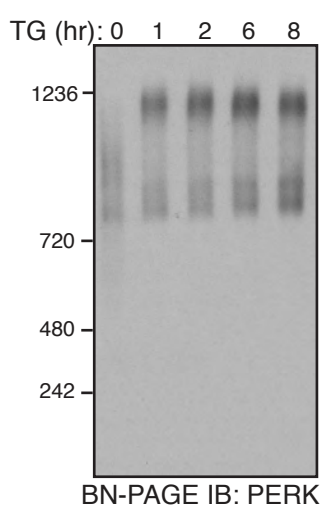

**D**

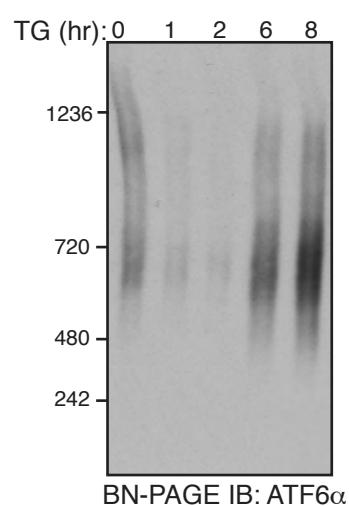

**E**

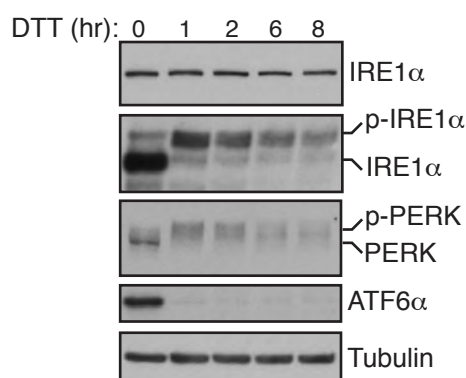

**F**

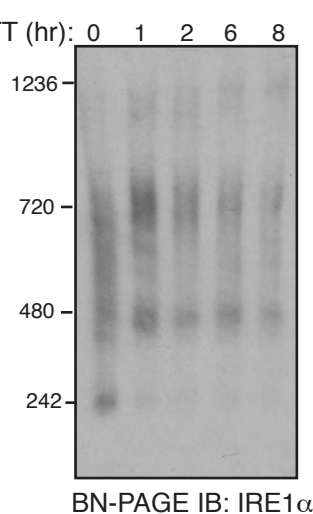

**G**

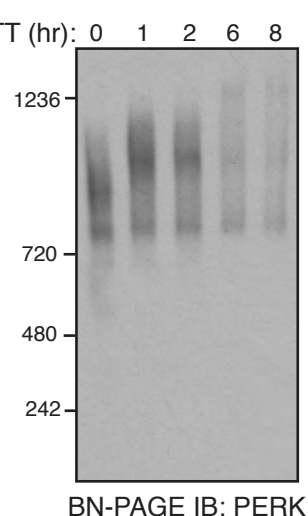

**H**

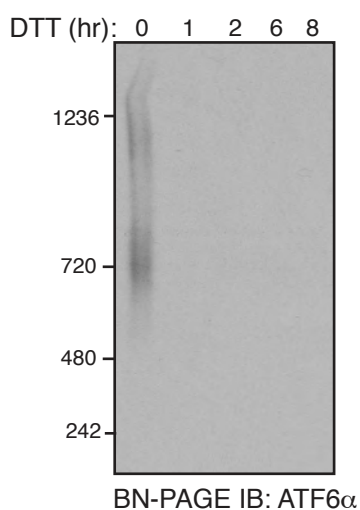

**I**

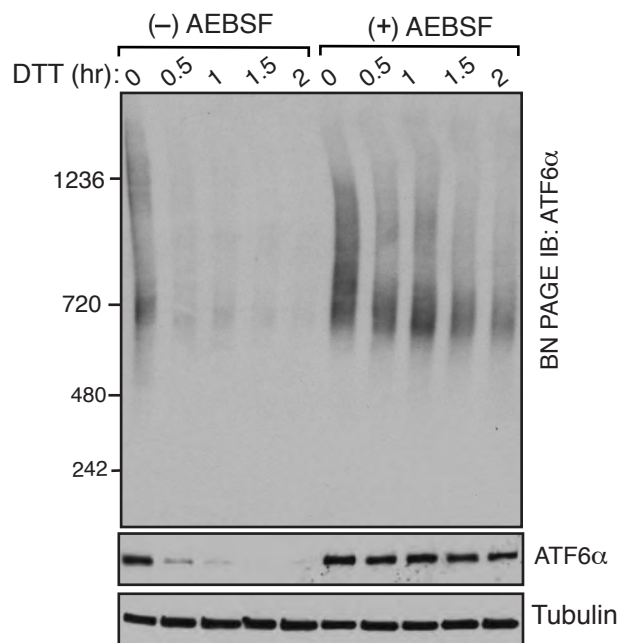

**Figure 1. Changes in the endogenous complexes of IRE1 $\alpha$ , PERK and ATF6 $\alpha$  during ER stress.** (A) HEK293 cells were treated with 7.5 $\mu$ g of thapsigargin (TG) for the indicated time points and lysed with digitonin. The lysates were separated by SDS PAGE and immunoblotting for the indicated proteins. A phos-tag based immunoblotting was performed for probing phosphorylated IRE1 $\alpha$ . (B) The digitonin lysates from A were analyzed by BN-PAGE immunoblotting with IRE1 $\alpha$  antibodies, (C) PERK antibodies, or (D) ATF6 $\alpha$  antibodies. (E-H) HEK293 cells were treated with 5mM DTT for the indicated time points and analyzed as in (A-D). (I) HEK293 cells were pretreated with a serine protease inhibitor AEBSF (250 $\mu$ M) for 1hr and subsequently treated with DTT at the indicated time to induce ER stress. The digitonin lysates were analyzed as in A and D. Experiments shown are representative of experiments repeated at least two times during different days.

The following figure supplements are available for figure 1:

**Figure 1 - figure supplement 1**



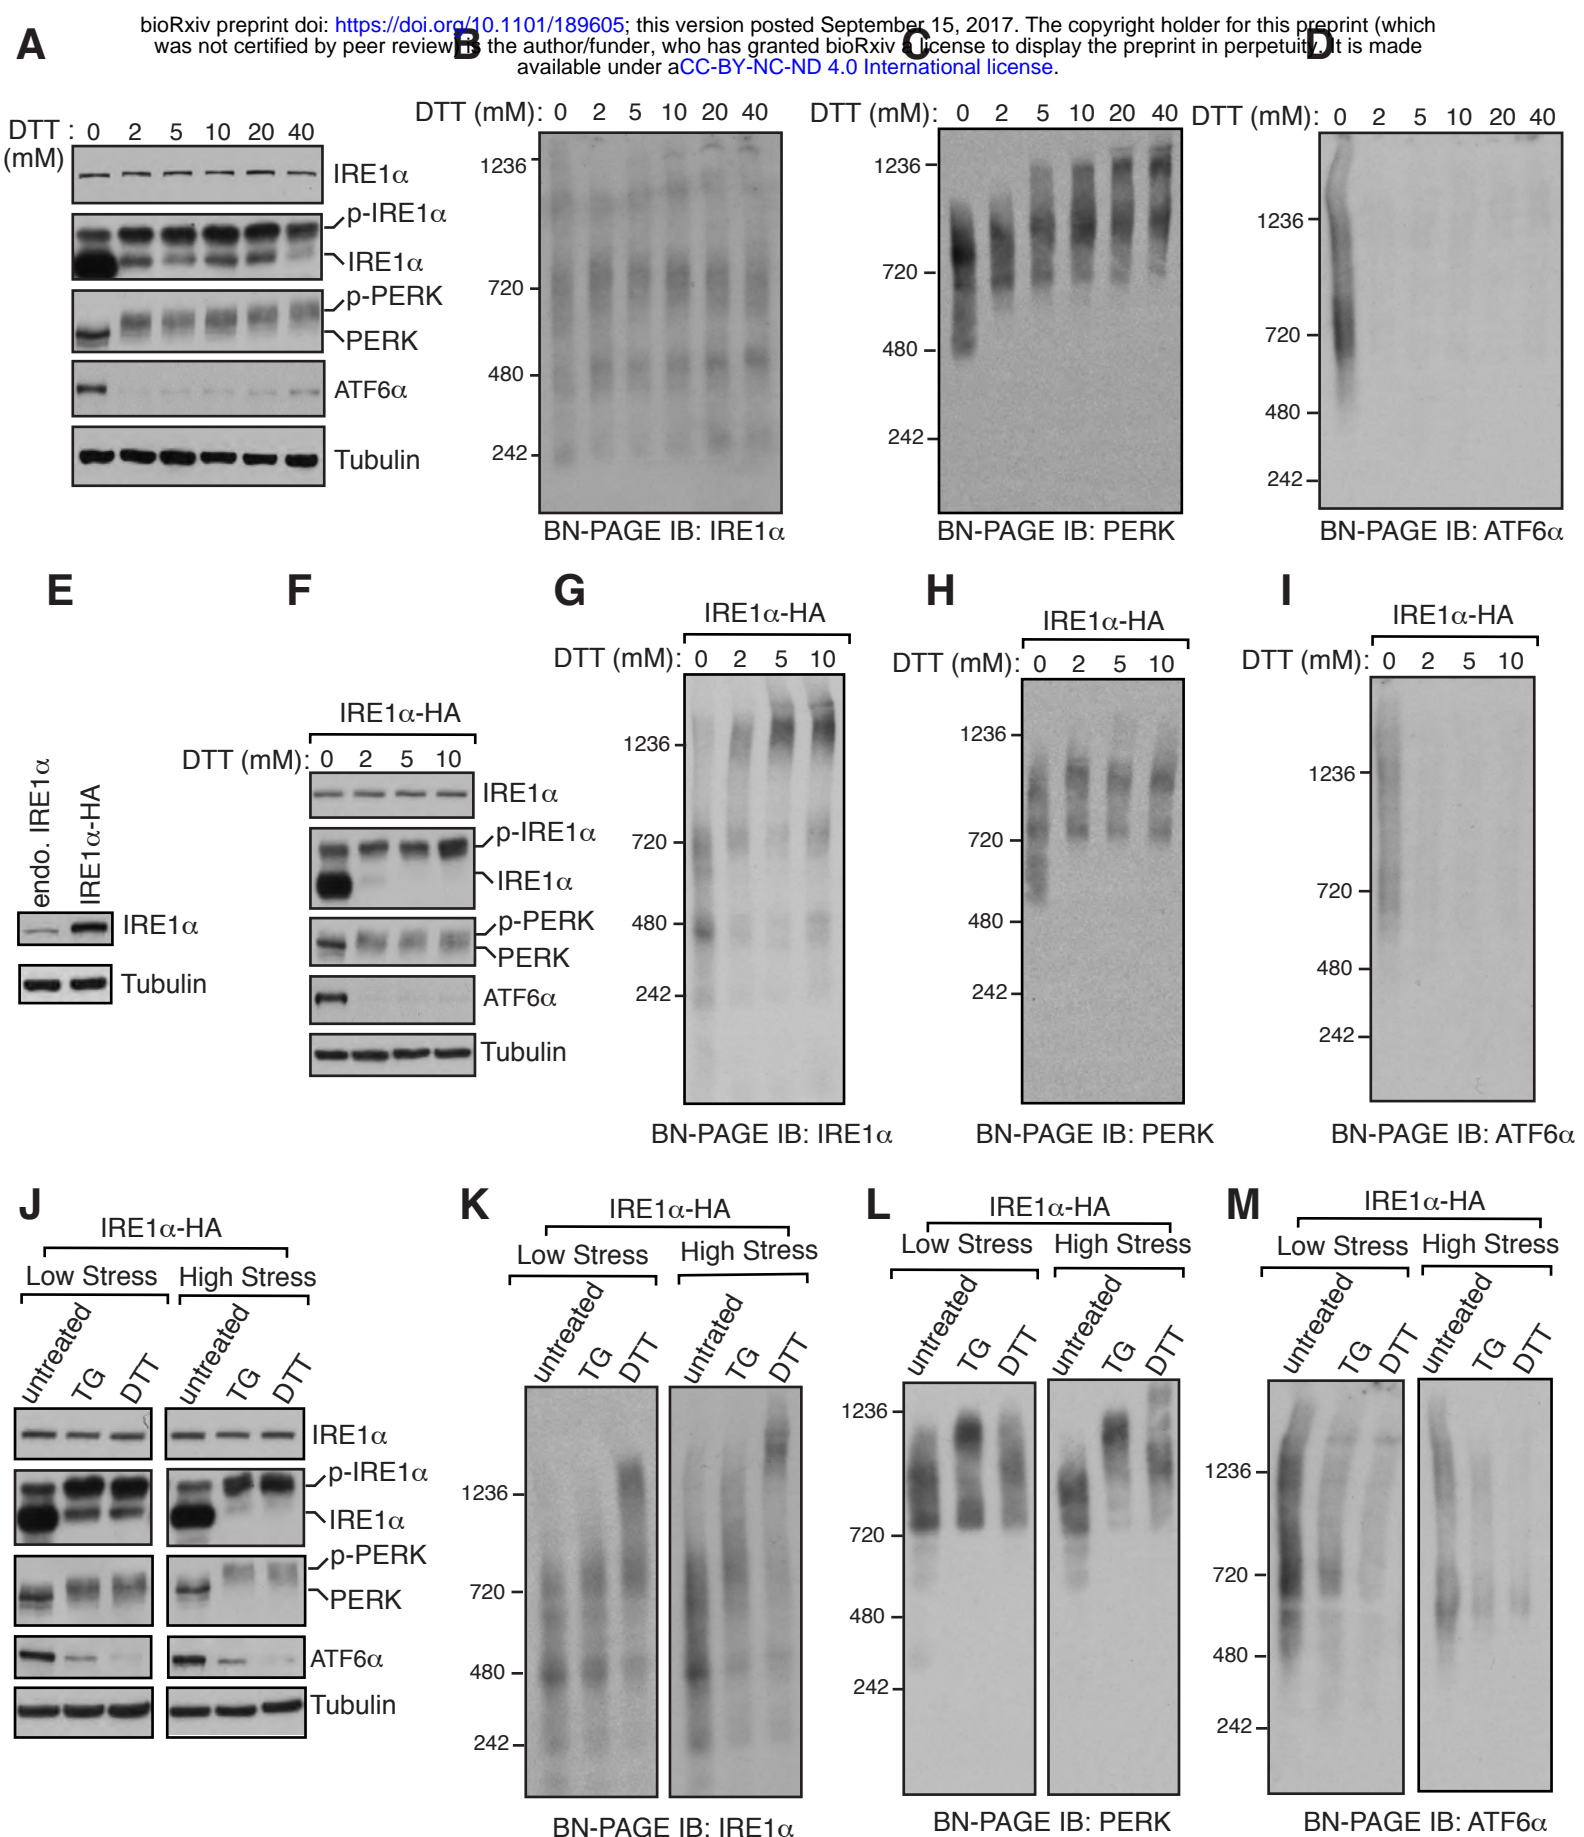

**Figure 2. Overexpressed IRE1 $\alpha$ , but not the endogenous IRE1 $\alpha$ , exhibits ER stress induced changes in its complexes.** **(A)** HEK293 cells were treated with the indicated concentrations of DTT for 2.5 hours and analyzed for immunoblotting with the indicated antigens. **(B-D)** The samples from **A** were analyzed by BN-PAGE immunoblotting and probed for the indicated antigens. **(E)** An immunoblot comparing the expression levels between the endogenous IRE1 $\alpha$  in HEK293 and IRE1 $\alpha$ -HA complemented into HEK293 IRE1 $\alpha$ <sup>-/-</sup> cells. **(F)** HEK293 IRE1 $\alpha$ <sup>-/-</sup> complemented IRE1 $\alpha$ -HA cells were treated with increasing concentration of DTT for 2.5 hrs and analyzed by immunoblotting for the indicated antigens. **(G-I)** The samples from **F** were analyzed by BN-PAGE immunoblotting and probed for the indicated antigens. **(J)** HEK293 IRE1 $\alpha$ <sup>-/-</sup> complemented IRE1 $\alpha$ -HA cells were induced with either low stress by treating with a low concentration of TG (2.5  $\mu$ M) or DTT (2 mM) or high stress by treating with a high concentration of TG (25  $\mu$ M) or DTT (30 mM) for 2.5 hours. The cell lysates were analyzed by standard immunoblotting for the indicated antigens. **(K-M)** The samples from **J** were analyzed by BN-PAGE immunoblotting for the indicated antigens. Most of the experiments shown are representative of experiments repeated at least two times during different days.



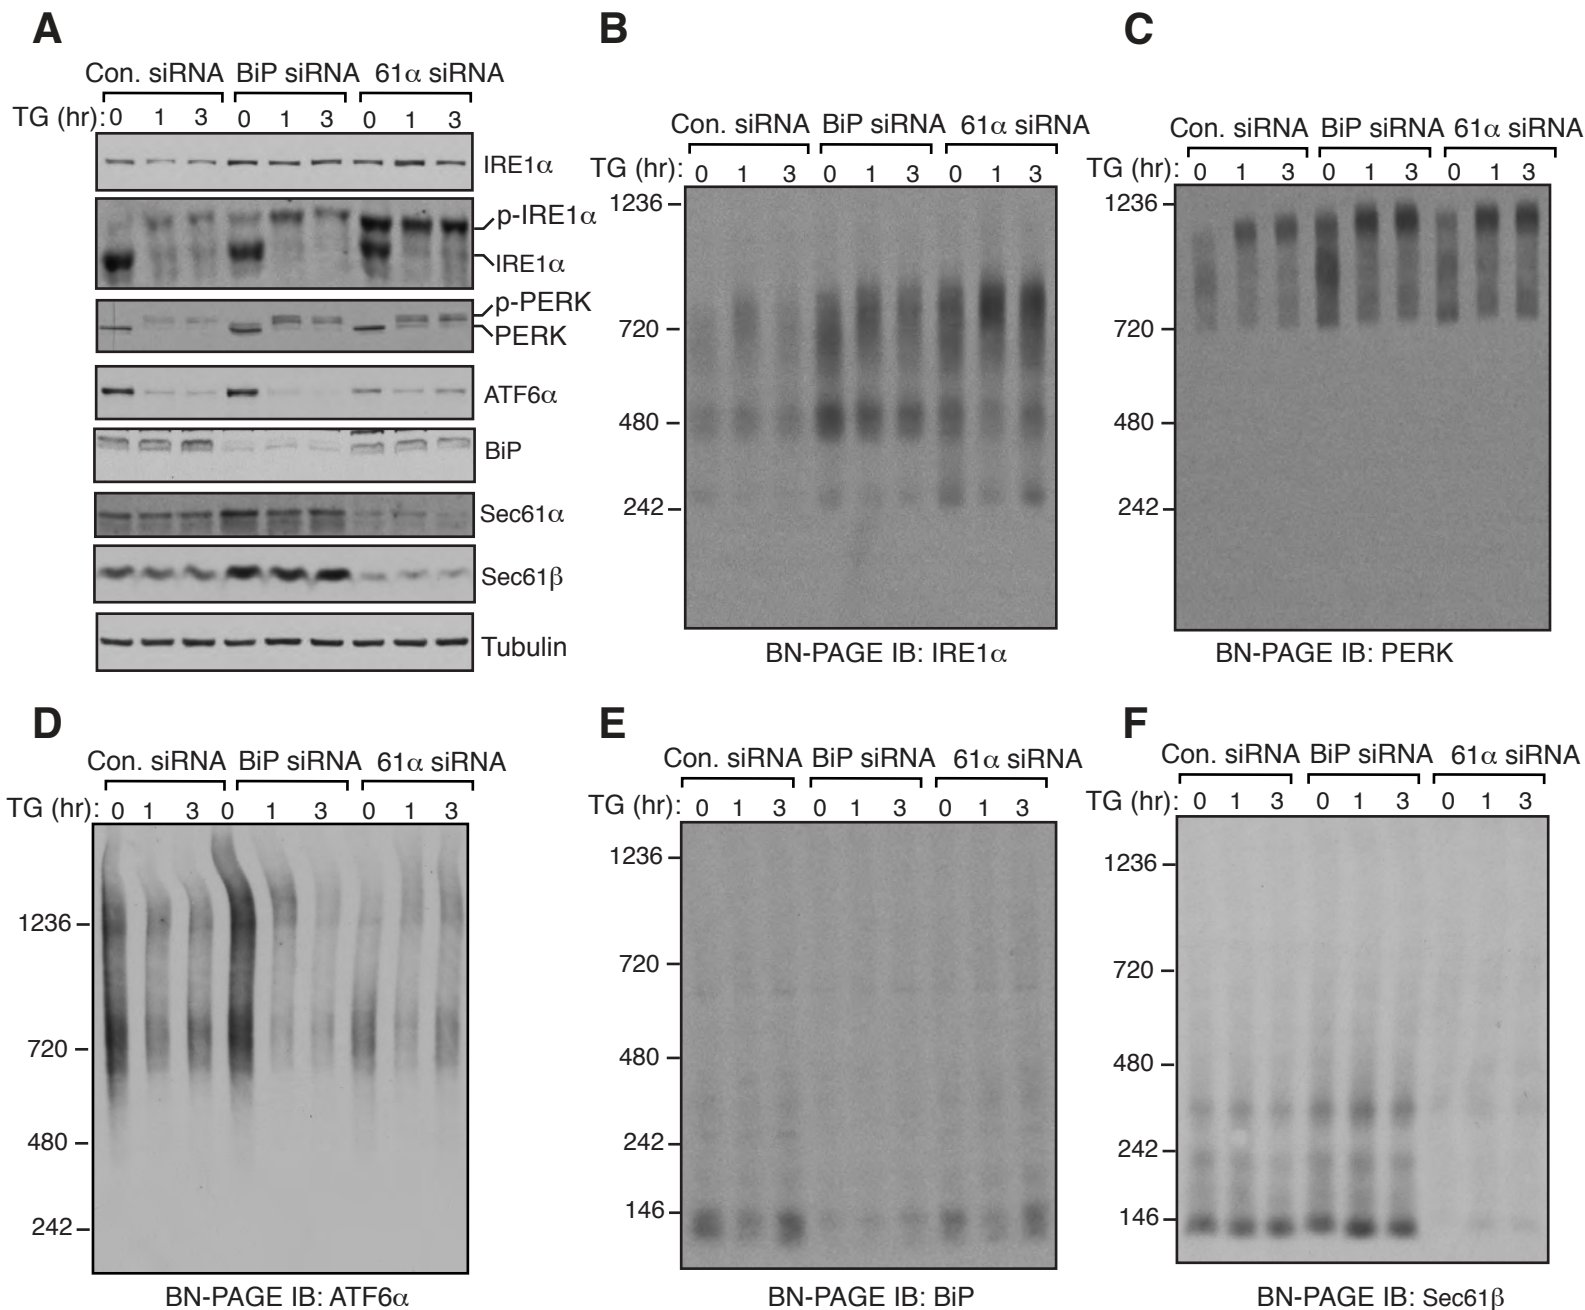

**Figure 3. Depletion of BiP neither affects complexes or activation of all three UPR sensors**

(A) HEK293 cells were transfected with siRNA oligos directed against either BiP siRNA or Sec61 $\alpha$  for two consecutive days. After 72 hours of transfection, the cells were treated with 2.5 $\mu$ g of TG for the indicated time points and analyzed by immunoblotting for the indicated antigens. (B-F) The samples from A were analyzed by BN-PAGE immunoblotting for the indicated antigens. Experiments shown are representative of experiments repeated at least two times during different days.

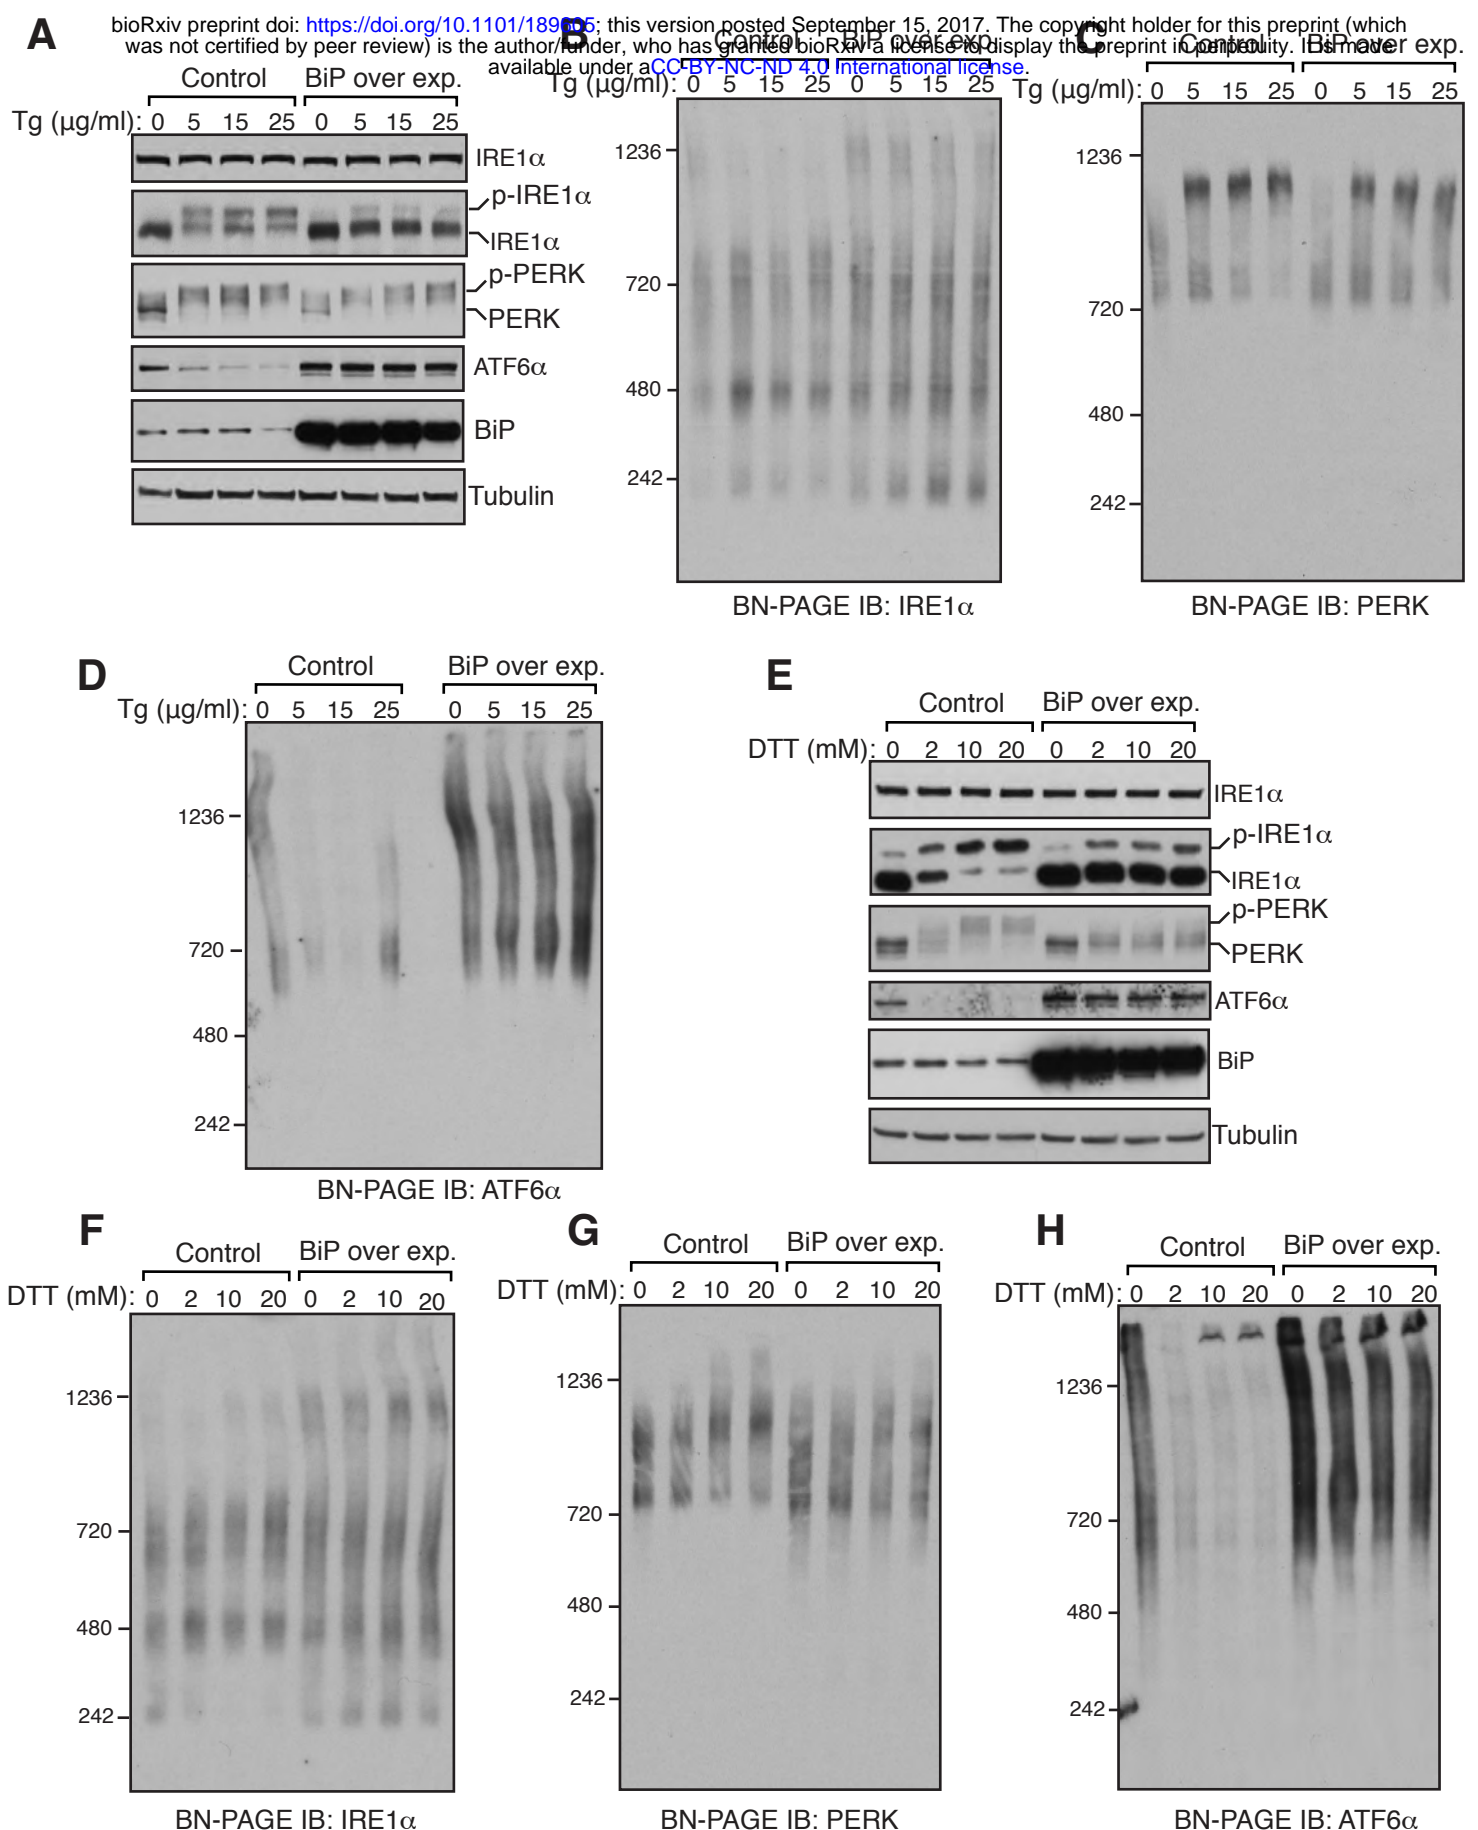

**Figure 4. Overexpression of BiP has little effects on complexes of IRE1α, PERK, and ATF6α**

(A) HEK293 cells were transfected with either an empty plasmid (control) or plasmid encoding BiP. After 16 hours of transfection, media was replenished and grown for another 24 hrs. The cells were treated with the indicated concentrations of TG for 2 hrs. The cells were harvested and analyzed by immunoblotting for the indicated antigens. (B-D) The samples from A were analyzed by BN-PAGE immunoblotting for the indicated proteins. (E) As in A, the cells were transfected with either an empty plasmid or plasmid encoding BiP and treated with the indicated concentrations of DTT for 2 hrs. The cells were harvested and analyzed by immunoblotting for the indicated antigens. (F-H) The samples from E were analyzed by BN-PAGE immunoblotting for the indicated proteins. Experiments shown are representative of experiments repeated at least two times during different days.

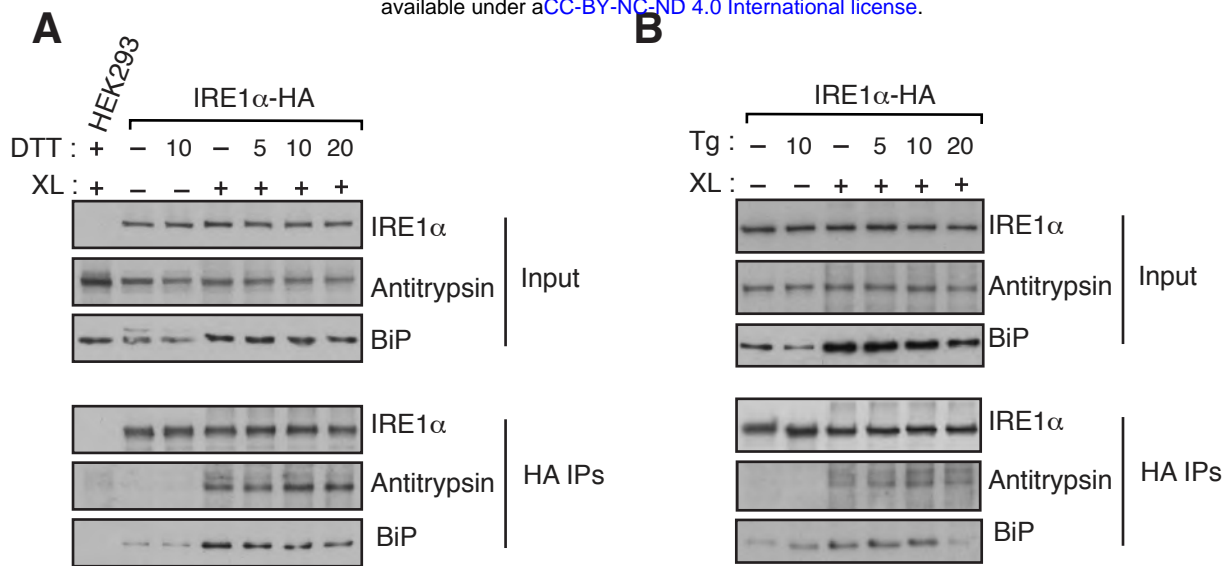

**C**

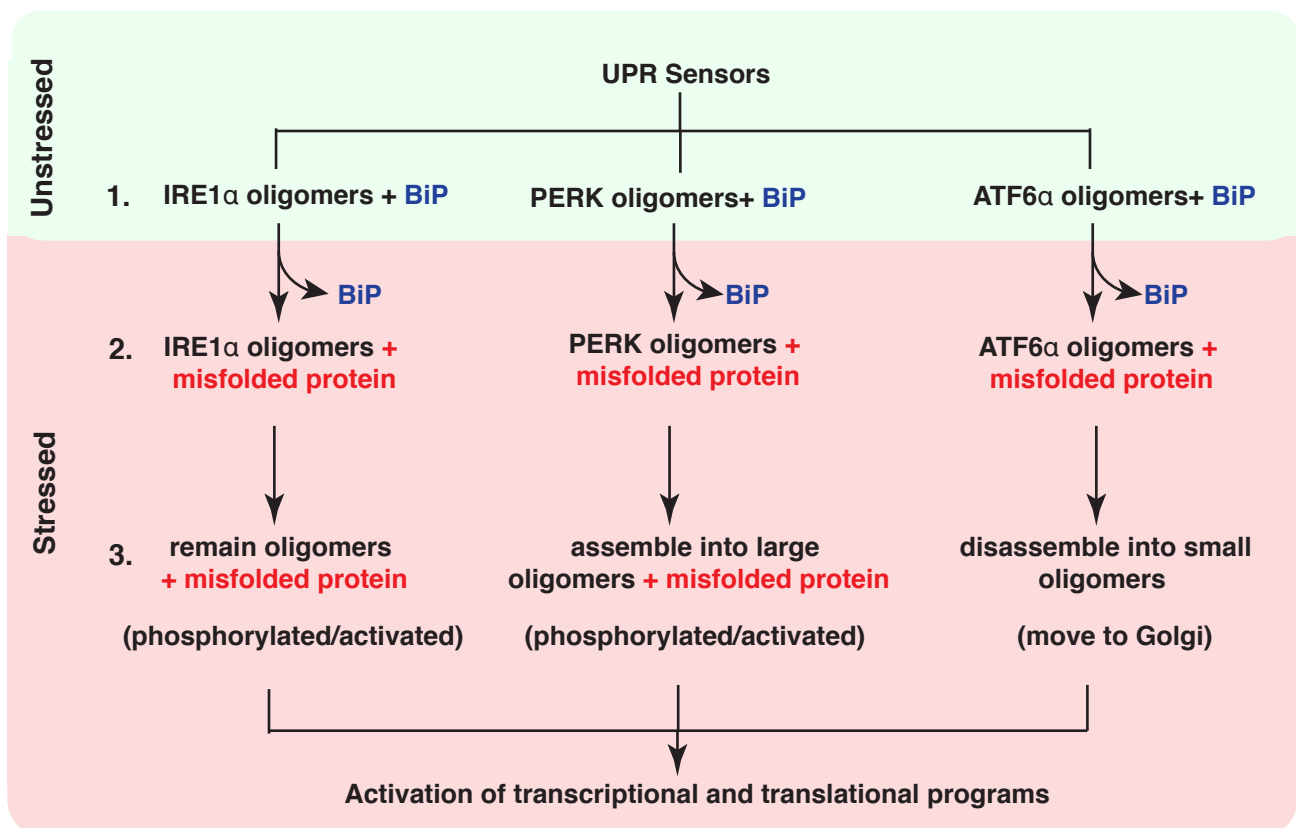

**Figure 5. The UPR sensor IRE1 $\alpha$  interacts with misfolded antitrypsin**

(A) HEK293 IRE1 $\alpha$ <sup>-/-</sup> cells complemented with IRE1 $\alpha$ -HA were transfected with either empty plasmid or NHK  $\alpha$ 1 antitrypsin and induced with 10 ng of doxycycline to drive the expression of IRE1 $\alpha$ -HA. After 24 hrs of transfection, the cells were reacted with DSP crosslinker (XL). As a control, HEK293 cells transfected NHK  $\alpha$ 1 antitrypsin and treated with the crosslinker. The crosslinked samples were immunoprecipitated with anti-HA magnetic antibodies and analyzed by immunoblotting with the indicated antibodies. (B) The procedure was identical to A, but the cells were treated with 5 $\mu$ g TG for 1 hr before crosslinking. Experiments shown are representative of experiments repeated at least two times during different days. (C) Models for oligomerization and activation of UPR sensors. Step 1: All three endogenous UPR sensors exist as preformed oligomers associated with BiP in cells. Step 2: Upon ER stress, oligomers of UPR sensors bind to misfolded proteins with concomitant release of BiP from UPR sensors. Step 3: Once binding to misfolded proteins, IRE1 $\alpha$  may undergo conformational changes without major changes in the oligomerization state, which in turn activates its kinase and RNase activities. PERK is activated and phosphorylated through assembling into large oligomers from small oligomers upon binding with misfolded proteins. Conversely, misfolded proteins binding to ATF6 $\alpha$  oligomers induce disassembly of oligomers, thus migrating to Golgi for activation.

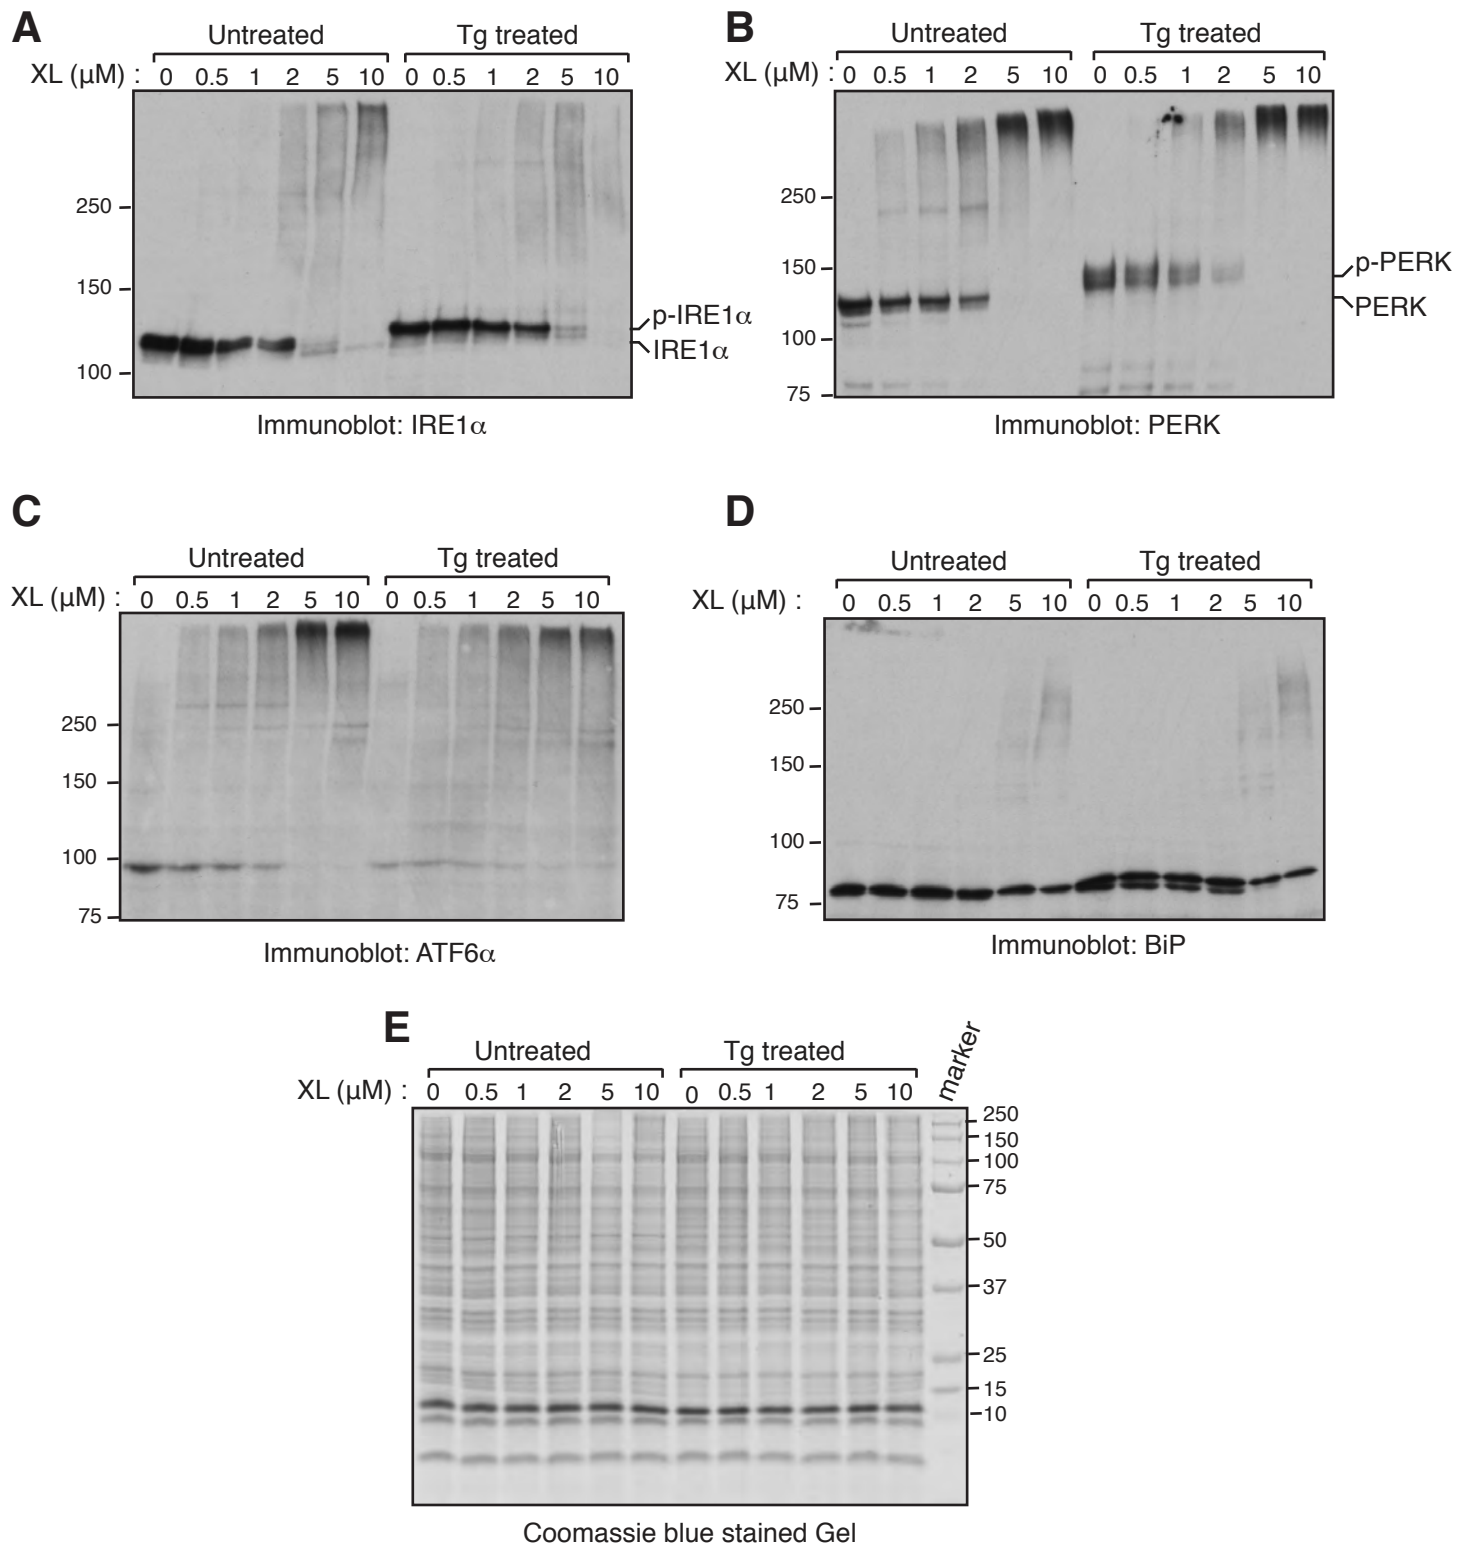

**Figure 1- figure supplement 1: Chemical crosslinking of UPR sensors in cells**

(A-E) HEK293 cells were either left untreated or treated with 5 $\mu$ g TG/ml for 60 min. After the treatment, the cells were permeabilized with a low concentration of Digitonin. Subsequently, the permeabilized cells were treated with 0.5 to 10 $\mu$ M BMH for 30 min on ice. The cells were directly harvested and analyzed by either immunoblotting with the indicated antigens or coomassie blue staining.
